1 **A minimal synaptic model for direction selective neurons in *Drosophila***

2

3 Jacob A. Zavatone-Veth<sup>1,2,a</sup>, Bara A. Badwan<sup>3</sup>, Damon A. Clark<sup>1,2,4,5,#</sup>

4 1 – Department of Physics

5 2 – Department of Molecular, Cellular, and Developmental Biology

6 3 – School of Engineering and Applied Science

7 4 – Interdepartmental Neuroscience Program

8 5 – Department of Neuroscience

9 Yale University, New Haven, CT 06511, USA

10

11 a – Present address: Department of Physics, Harvard University, Cambridge, MA 02138, USA

12 # – Corresponding author

13

14 **Abstract**

15

16 Visual motion estimation is a canonical neural computation. In *Drosophila*, recent advances have  
17 identified anatomical and functional circuitry underlying direction-selective computations.

18 Models with varying levels of abstraction have been proposed to explain specific experimental  
19 results, but have rarely been compared across experiments. Here we construct a minimal,

20 biophysically inspired synaptic model for *Drosophila*'s first-order direction-selective T4 cells

21 using the wealth of available anatomical and physiological data. We show how this model relates

22 mathematically to classical models of motion detection, including the Hassenstein-Reichardt

23 correlator model. We used numerical simulation to test how well this synaptic model could

24 reproduce measurements of T4 cells across many datasets and stimulus modalities. These

25 comparisons include responses to sinusoid gratings, to apparent motion stimuli, to stochastic

26 stimuli, and to natural scenes. Without fine-tuning this model, it sufficed to reproduce many, but

27 not all, response properties of T4 cells. Since this model is flexible and based on straightforward

28 biophysical properties, it provides an extensible framework for developing a mechanistic

29 understanding of T4 neural response properties. Moreover, it can be used to assess the

30 sufficiency of simple biophysical mechanisms to describe features of the direction-selective

31 computation and identify where our understanding must be improved.

32

### 33 **Introduction**

34

35 Motion estimation is a canonical visual computation that requires integrating information  
36 nonlinearly over both time and space. Direction-selective signals are tuned to motion in a  
37 preferred-direction (PD), which elicits the strongest responses, while motion in the opposite,  
38 null-direction (ND), elicits a weaker response. This directional computation has been described  
39 by a wide variety of computational models. Classical models, such as the Hassenstein-Reichardt  
40 correlator (HRC) (Hassenstein and Reichardt, 1956) and motion energy model (Adelson and  
41 Bergen, 1985), rely on sensing correlations between pairs points separated in time and space.  
42 These phenomenological models have provided striking insights into neural and behavioral  
43 responses in a variety of species, including in flies (Yang and Clandinin, 2018).

44

45 In the last decade, advances in defining the anatomical and functional connectivity of  
46 *Drosophila*'s visual circuits suggest that we should move towards more mechanistic, biophysical  
47 descriptions of this computation. Here, we follow previous work (Gruntman et al., 2018; Torre  
48 and Poggio, 1978) to propose a simple, biophysically-plausible synaptic model for direction-  
49 selectivity in *Drosophila*'s ON-edge sensitive motion pathway. We compare its predictions to  
50 measurements made by several research groups in response to many stimuli, giving us a tool for  
51 understanding which features are sufficient to describe different response properties.

52

53 The inputs to direction-selective cells have been identified by electron microscopy and through  
54 genetic silencing experiments. The most peripheral direction-selective neurons in the *Drosophila*  
55 optic lobe are the T4 and T5 cells, which are sensitive to moving ON-edges (consisting of  
56 contrast increments) and OFF-edges (consisting of contrast decrements), respectively (Clark et  
57 al., 2011; Joesch et al., 2010; Maisak et al., 2013). Electron microscopy and genetic silencing  
58 have identified primary inputs to T4 and T5 cells (Serbe et al., 2016; Shinomiya et al., 2019;  
59 Strother et al., 2017; Takemura et al., 2017). These studies suggest that T4 cells receive input  
60 from three distinct colinear spatial locations, with the neurons Mi1 and Tm3 both relaying  
61 information about the central point, and the neurons Mi9 and Mi4 acting as relays for the two  
62 flanking points (Takemura et al., 2017) (**Fig. 1A**). The neuron T5 appears to have a similar

63 spatial structure, with different input neurons (Shinomiya et al., 2019). Both cell types also  
64 receive spatially-localized inputs from other neurons, whose functions remain less well  
65 understood (Shinomiya et al., 2019; Takemura et al., 2017).

66  
67 The physiological properties of the inputs to T4 and T5 cells have also been characterized. At  
68 their receptive field centers, Mi1 and Tm3 cells respond quickly to visual stimuli, and provide  
69 excitatory input to T4 (Arenz et al., 2017; Behnia et al., 2014; Gruntman et al., 2018; Strother et  
70 al., 2017; Takemura et al., 2017). On the preferred direction side of the receptive field, the cells  
71 Mi4 and CT1 are ON cells with slower kinetics, likely inhibiting T4 cells (Arenz et al., 2017;  
72 Shinomiya et al., 2019; Takemura et al., 2017). On the null direction side of the receptive field,  
73 Mi9 cells are delayed OFF cells, which are likely to provide inhibitory, glutamatergic input to T4  
74 cells (Arenz et al., 2017; Salazar-Gatzimas et al., 2018). The inputs to T5 cells similarly appear  
75 to be arranged with a fast central input and delayed flanking inputs, but whether these inputs  
76 excite or inhibit T5 is less clear (Arenz et al., 2017; Behnia et al., 2014; Shinomiya et al., 2019;  
77 Wienecke et al., 2018).

78  
79 The functional properties of the T4 and T5 cells and their inputs have been interrogated using  
80 many stimulus and measurement modalities. This wealth of data has led to many different  
81 models that seek to describe the response properties of T4 and T5 cells (Arenz et al., 2017;  
82 Badwan et al., 2019; Behnia et al., 2014; Clark et al., 2011; Creamer et al., 2018; Eichner et al.,  
83 2011; Gruntman et al., 2018; Haag et al., 2016; Leong et al., 2016; Leonhardt et al., 2016;  
84 Salazar-Gatzimas et al., 2018; Salazar-Gatzimas et al., 2016; Serbe et al., 2016; Strother et al.,  
85 2017; Wienecke et al., 2018). Many measurements of T4 and T5 have demonstrated  
86 phenomenology that could not be produced by the classical HRC model. However, proposed  
87 models were most often evaluated by how they reproduced the associated dataset, rather than the  
88 full the range of phenomena in the literature. Here we ask how a minimal, constrained model  
89 reproduces T4 phenomenology (and some T5 phenomenology) from many different experiments.  
90 We compare the model to data in response to moving edges, to sinusoids, to apparent motion  
91 stimuli, to stochastic stimuli, and to natural scenes.

92

93 In this minimal model, the spatially-separated inputs to T4 are represented as three linear-  
94 nonlinear (LN) transformations of the input contrast (Dayan and Abbott, 2001). These model  
95 neurons then interact with T4 by altering the conductance of excitatory and inhibitory currents  
96 (Gruntman et al., 2018; Torre and Poggio, 1978). This construction is simple enough to allow  
97 some algorithmic intuition but incorporates greater biophysical realism than most  
98 phenomenological models. We do not fit the model to every dataset. Rather, our goal is to test  
99 the sufficiency of a minimal circuit model to account for different measured phenomena in T4  
100 cells. This model does not contain any exotic channels or receptors, and it biophysically models  
101 the membrane voltage and intracellular calcium concentration in T4 neurons. It does not  
102 reproduce all functional properties of T4 cells, but it provides a flexible framework for  
103 understanding the sufficiency of simple circuit properties and mechanisms to describe the  
104 processing properties of T4 neurons. In cases where this model is insufficient to describe data,  
105 we suggest how model parameters might be changed to better describe the data.

106

## 107 **Methods**

108

### 109 *Constructing an anatomically constrained synaptic model for T4 cells*

110 Following proposed synaptic architectures for direction-selective computations (Gruntman et al.,  
111 2018; Torre and Poggio, 1978), we constructed an elementary motion detector based on the  
112 connectome of the *Drosophila* optic lobe. We simplified this structure to consider three inputs to  
113 a T4 cell: a delayed ND-offset OFF inhibitory input representing Mi9, a centered ON excitatory  
114 input representing Mi1 and Tm3, and a delayed PD-offset ON inhibitory input representing Mi4  
115 (and/or CT1) (**Figure 1A**) (Strother et al., 2017; Takemura et al., 2017).

116

117 We will model these inputs to T4 cells as simple linear-nonlinear (LN) transformations of the  
118 input contrast (Behnia et al., 2014). We will further model effects of these synaptic inputs on the  
119 membrane potential of the T4 cell by changes in the conductance of excitatory and inhibitory  
120 currents (Torre and Poggio, 1978). For notational convenience, we define our model below in  
121 continuous space and time, noting as needed where adjustments are made for the discretization  
122 used in numerical simulation. We take the inputs to the model to be contrasts. We take each  
123 input to the motion detector to have an  $L_1$ -normalized Gaussian spatial acceptance function

124

125

$$h(x) = \frac{1}{\sqrt{2\pi\sigma^2}} e^{-\frac{x^2}{2\sigma^2}}$$

126

127 where the spatial parameter  $\sigma$  is related to the full width at half maximum (FWHM) of the  
128 acceptance function by  $\text{FWHM} = 2\sqrt{2\log 2} \sigma$ . We fix  $\text{FWHM} = 5.7^\circ$  to approximately match  
129 the spatial acceptance functions of photoreceptors in the fly eye (Stavenga, 2003). To represent  
130 the delayed inputs to the motion detector, we use the  $L_2$ -normalized lowpass temporal filter

131

132

$$f(t) = 2\tau^{-\frac{3}{2}} t \Theta(t) e^{-\frac{t}{\tau}}$$

133

134 where  $\Theta(x)$  is the Heaviside step function. To represent the non-delayed central input to the  
135 motion detector, we replace the temporal filter  $f$  by its derivative  $\dot{f}$ . We note that the term  
136 resulting from the distributional derivative of  $\Theta(t)$  vanishes when  $\dot{f}$  is convolved with any signal  
137 as it is proportional to  $t \delta(t)$ , where  $\delta(x)$  is the Dirac delta distribution. Using these filters, we  
138 define the filtered contrast signal  $s$  at each point in spacetime:

139

140

$$s(t, x) := (fh * c)(t, x)$$

141

142 where  $c(t, x)$  is the input contrast and  $*$  denotes spatiotemporal convolution over the appropriate  
143 domain. As taking the temporal derivative of the filtered contrast signal is equivalent to filtering  
144 with the derivative of the temporal filter, we will use the notation  $\dot{s}$  for the high-pass-filtered  
145 signal throughout. For convenient handling of spatial boundary conditions, we numerically  
146 simulate the full  $360^\circ$  of visual space, which is a periodic interval.

147

148 We denote the spacing between neighboring inputs as  $\Delta$ . Here, we use  $5^\circ$  spacing so that the  
149 inputs evenly tile  $360^\circ$  of visual space. Then, we define the three inputs to the motion detector as  
150 rectified-linear functions of the filtered contrast signal at three points in space, mimicking the  
151 polarity-selectivity of the inputs to T4 cells:

152

153 
$$g_1(t, x) := g_{\text{inh}} R(-s(t, x - \Delta))$$

154 
$$g_2(t, x) := g_{\text{exc}} R(\dot{s}(t, x))$$

155 
$$g_3(t, x) := g_{\text{inh}} R(s(t, x + \Delta))$$

156

157 where  $R(x) := \max\{0, x\}$  is the ramp function and  $g_{\text{inh}}$  and  $g_{\text{exc}}$  are parameters scaling the  
158 effects of each input on the postsynaptic conductances (**Figure 1A-B**). Thus far, we have  
159 represented the conductances as linear-nonlinear (LN) transformations of the input contrast  
160 (Dayan and Abbott, 2001).

161

162 We define the membrane potential  $V_m$  of the postsynaptic cell such that the reversal potential for  
163 leak currents is 0 mV. The cell's membrane voltage dynamics are then given as (Torre and  
164 Poggio, 1978)

165

166 
$$c_m \dot{V}_m + V_m(g_{\text{leak}} + g_1 + g_2 + g_3) = g_1 E_{\text{inh}} + g_2 E_{\text{exc}} + g_3 E_{\text{inh}}$$

167

168 where  $c_m$  is the membrane capacitance,  $g_{\text{leak}}$  is the leak conductance, and  $E_{\text{inh}}$  and  $E_{\text{exc}}$  are the  
169 reversal potentials for inhibitory and excitatory currents, respectively. Neglecting capacitive  
170 currents, we solve for the pseudo-steady-state (Gruntman et al., 2018; Torre and Poggio, 1978).

171

172 
$$V_m = \frac{g_1 E_{\text{inh}} + g_2 E_{\text{exc}} + g_3 E_{\text{inh}}}{g_{\text{leak}} + g_1 + g_2 + g_3}$$

173

174 Then, we model the transformation from membrane voltage to calcium concentration  $C$  as a  
175 positively rectifying half-quadratic function  $R^2(x) := (R(x))^2$ :

176

177 
$$C(t, x) := R^2(V_m(t, x))$$

178

179 which qualitatively captures the expansive nonlinear effect of the transformation between  
180 voltage and calcium (Kato et al., 2014; Leong et al., 2016) (**Figure 1B**).

181

182 *Visual stimuli*

183 We presented this model with spatiotemporal contrast patterns to mimic a variety of visual  
184 stimuli used in the field. Detailed mathematical descriptions of each stimulus are given in  
185 **Appendix A**. Briefly, we presented the model with moving and stationary sinusoidal gratings,  
186 with apparent motion stimuli, with stochastic stimuli including those with imposed correlations,  
187 and with natural scenes. In each case, we compared how the model responds to the published  
188 responses of T4 and T5 neurons.

189

190 *Selecting model parameters*

191 This model uses a parameter set equal to one that was developed to explain direction-opponency  
192 in T4 cells (Badwan et al., 2019). There, we fixed the filter time constant  $\tau = 150$  ms to produce  
193 peak responses to PD sinusoidal gratings at  $\sim 1$  Hz (Badwan et al., 2019; Creamer et al., 2018;  
194 Maisak et al., 2013). We fix the excitatory and inhibitory reversal potentials to values of  $E_{\text{exc}} =$   
195  $60$  mV and  $E_{\text{inh}} = -30$  mV, which are plausible based on electrophysiological experiments  
196 (Gruntman et al., 2018). As the model membrane potential can be rewritten as

197

198 
$$V_m = \left( \frac{g_1}{g_{\text{leak}}} E_{\text{inh}} + \frac{g_2}{g_{\text{leak}}} E_{\text{exc}} + \frac{g_3}{g_{\text{leak}}} E_{\text{inh}} \right) \left( 1 + \frac{g_1}{g_{\text{leak}}} + \frac{g_2}{g_{\text{leak}}} + \frac{g_3}{g_{\text{leak}}} \right)^{-1}$$

199

200 only the ratios of  $g_1$ ,  $g_2$ , and  $g_3$  to  $g_{\text{leak}}$ , rather than their absolute magnitudes, are relevant. We  
201 therefore express the postsynaptic conductances as non-dimensional quantities in units of  $g_{\text{leak}}$ ,  
202 leaving  $g_{\text{exc}}/g_{\text{leak}}$  and  $g_{\text{inh}}/g_{\text{leak}}$  as the model's two free parameters. The procedure used to  
203 select the values of these parameters is described in detail in **Appendix B**. As shown previously  
204 (Badwan et al., 2019), there exists a broad region of parameter space for which this model  
205 displays responses to sinusoid gratings with a temporal frequency of 1 Hz and a spatial  
206 wavelength of  $45^\circ$  consistent with those measured in T4 and T5 cells. We note that our choice of  
207 filter normalization, which differs from that in the previous use of this model (Badwan et al.,  
208 2019), affects the parameter values chosen, as it scales  $g_1$ ,  $g_2$ , and  $g_3$  relative to  $g_{\text{leak}}$ . **Table 1**  
209 summarizes the model parameter values used in all simulations.

210

211 **Table 1:** Parameter values used in all simulations.

| Parameter                                                             | Value       |
|-----------------------------------------------------------------------|-------------|
| Photoreceptor spacing $\Delta$                                        | $5^\circ$   |
| Photoreceptor spatial FWHM                                            | $5.7^\circ$ |
| Temporal filter time constant $\tau$                                  | 0.150 s     |
| Spatial sampling interval $\Delta x$                                  | $0.5^\circ$ |
| Temporal sampling interval $\Delta t$                                 | 1/240 s     |
| Leak current reversal potential $E_{\text{leak}}$                     | 0 mV        |
| Excitatory current reversal potential $E_{\text{exc}}$                | +60 mV      |
| Inhibitory current reversal potential $E_{\text{inh}}$                | -30 mV      |
| Excitatory to leak conductance ratio $g_{\text{exc}}/g_{\text{leak}}$ | 0.1         |
| Inhibitory to leak conductance ratio $g_{\text{inh}}/g_{\text{leak}}$ | 0.3         |

212

213 *In vivo two-photon calcium imaging in T4 cells*

214 Most of our comparisons relate the synaptic model's responses to published data, but we also  
215 compare the model to a new dataset of T4 cell responses to glider stimuli. The protocol for two-  
216 photon calcium imaging in T4 cells matches published methods (Badwan et al., 2019) and used  
217 Psychtoolbox (Brainard, 1997; Kleiner et al., 2007; Pelli, 1997) to present stimuli on a  
218 panoramic visual display (Creamer et al., 2019). The glider stimuli presented during these  
219 measurements are described in **Appendix A**. Net responses were computed as the difference in  
220 responses to stimuli moving in the preferred and null directions of each T4 region of interest, and  
221 then averaged within each fly. Non-parametric two-sided Wilcoxon signed-rank tests were used  
222 to test whether median net responses differed significantly from zero (Hollander et al., 2013).  
223 For statistical purposes, each individual fly was considered to be an independent sample.

224

225 *Numerical methods*

226 Numerical simulations were conducted using Matlab 9.6 (R2019a) (The MathWorks, Natick,  
227 MA, USA). For stimuli containing randomly-generated components, responses were averaged



228 over 1000 realizations, and bootstrapped 95% confidence intervals for the mean were computed  
229 using the bias-corrected and accelerated percentile method (Efron, 1987). **Results**

230

231 *The synaptic model reduces to HRC-like terms*

232 To gain intuition about the operation of the T4 synaptic model, we consider its expansion in the  
233 small-input limit. To do so, we approximate the ramp function nonlinearity with a smooth  
234 function that represents a soft rectifier, which can be approximated by a linear function for small  
235 inputs (Fitzgerald and Clark, 2015). In particular, letting  $s_1(t) := s(t, x - \Delta)$ ,  $s_2(t) := s(t, x)$ ,  
236 and  $s_3(t) := s(t, x + \Delta)$ , and defining the non-negative constants  $\alpha := |g_{\text{inh}}E_{\text{inh}}/g_{\text{leak}}|$  and  $\gamma :=$   
237  $|g_{\text{exc}}E_{\text{exc}}/g_{\text{leak}}|$ , we have, to lowest order in the inputs,

238

$$239 \quad C \approx \frac{1}{16} (\alpha s_1 + \gamma \dot{s}_2 - \alpha s_3)^2$$

240

241 which may be rewritten as

242

$$243 \quad C \approx \frac{\alpha^2}{16} (s_1 - s_3)^2 + \frac{\gamma^2}{16} (\dot{s}_2)^2 + \frac{\alpha\gamma}{8} (s_1\dot{s}_2 - \dot{s}_2s_3)$$

244

245 This expansion represents a motion-energy approximation of the model. The first term in this  
246 expansion is a finite-difference approximation to a spatial derivative, while the second term is a  
247 temporal derivative at the center of the model's receptive field. The third term, which is the only  
248 direction-selective term, is the subtraction of two offset correlators with opposite directional  
249 tuning. This subtraction step provides some intuition for why this model mimics some properties  
250 of a fully-opponent HRC model (Badwan et al., 2019). This same direction-selective term also  
251 appears in the second-order expansion of the membrane voltage. Because this expansion of the  
252 model is only to second-order, it is invariant under contrast inversions, and cannot account for  
253 properties like ON-edge selectivity (Clark et al., 2014; Fitzgerald and Clark, 2015; Fitzgerald et  
254 al., 2011). Though this simple description does not capture all properties of the synaptic model, it  
255 provides intuition for the sensitivity of the model to certain stimulus features.

256

257 *The synaptic model is strongly ON/OFF-edge- and direction-selective*

258 T4 and T5 neurons are distinguished by the fact that T4 cells respond to ON-edges while T5 cells  
259 respond to OFF-edges (Maisak et al., 2013). We first compared the ON/OFF edge- and direction-  
260 selectivity of our T4 synaptic model to responses measured using two-photon calcium imaging in  
261 T4 cells sensitive to front-to-back (FTB) motion. Like T4 FTB cells, our synaptic model  
262 responded strongly to an ON edge moving in the FTB direction, but displayed little or no  
263 response to OFF edges moving in the FTB direction or to edges of either polarity moving in the  
264 back-to-front (BTF) direction (**Figure 1C**) (Maisak et al., 2013; Salazar-Gatzimas et al., 2016).

265

266 *The spatiotemporal tuning of the synaptic model is consistent with that of T4 cells*

267 Sinusoid grating stimuli are a common tool for characterizing direction-selective computations.  
268 Responses to these stimuli have been used to suggest that the membrane voltage of T5 cells is a  
269 nearly linear transformation of the visual input (**Figure 2A**) (Wienecke et al., 2018). In the  
270 synaptic model, the membrane voltage is a nonlinear function of the input contrast because the  
271 inputs are first rectified and then interact nonlinearly. We applied the same linearity testing  
272 protocol to our model membrane voltage, constructing predictions for responses to PD and ND  
273 drifting gratings from the responses to counterphase gratings (see **Appendix A**) (Jagadeesh et al.,  
274 1993; Wienecke et al., 2018). The responses of the T4 synaptic model to drifting gratings were  
275 similar to those predicted by a linear model for membrane voltage (**Figure 2A**). Thus, even a  
276 nonlinear system like the T4 synaptic model may appear reasonably linear by this protocol.

277

278 T4 and T5 cells display direction-opponent average calcium responses to sinusoid gratings  
279 (**Figure 2B**) (Badwan et al., 2019). This property means that the average response to PD motion  
280 is reduced by the addition of ND motion, imposing a strong constraint on models for the  
281 direction-selective computation. In particular, it implies that linear-nonlinear models with  
282 expansive nonlinearities cannot account for the response properties of these cells (Badwan et al.,  
283 2019). A variant of this synaptic model was proposed to account for these direction-opponent  
284 responses (Badwan et al., 2019). This model reproduces the strong suppression when ND motion  
285 is added to PD motion without substantial enhancement when orthogonal-direction (OD) motion  
286 is added to PD motion (**Figure 2B**).

287

288 T4 and T5 cells are tuned to the temporal frequency of sinusoidal stimuli (**Figure 2C**) (Creamer  
289 et al., 2018). This means that the mean neural response is maximal at a single temporal  
290 frequency, independent of the wavelength. This property also applies to measurements of fly  
291 behavior (Creamer et al., 2018; Kunze, 1961) and is consistent with the classical, fully-opponent  
292 HRC. We presented the T4 synaptic model with drifting gratings of different spatial and  
293 temporal frequencies to find the mean response to each. The model response was strongly  
294 temporal-frequency-tuned (**Figure 2C**). To quantify the temporal-frequency-tuning, we asked  
295 how much of the variance in this surface was accounted for by the product of one function of  
296 temporal frequency and one function of spatial frequency response (Creamer et al., 2018; Priebe et  
297 al., 2006). Such a separable model accounted for 99% of the variance in the response (see  
298 **Appendix A, Figure 2C**). Because of our choice of parameters, the input temporal filters in this  
299 model produce peak responses at around 1 Hz, lower than the roughly 2-4 Hz peak measured in  
300 these T4 cells.

301  
302 T4 and T5 cells respond to static gratings with amplitudes that depend on the grating orientation  
303 (Fisher et al., 2015) (**Figure 2D**). The preferred orientation (defined by the vector normal to the  
304 edges in a static grating) approximately matches the preferred direction of motion of these cells  
305 (Maisak et al., 2013). The convention we use here for defining the orientation of a static grating  
306 is rotated 90° relative to that used in the original study, which defined orientation in terms of  
307 vectors parallel, rather than normal, to the edges (Fisher et al., 2015) (see **Appendix A**). When  
308 the T4 synaptic model was presented with both static and drifting gratings of many different  
309 orientations, it reproduced the orientation tuning observed experimentally for both static and  
310 moving gratings (**Figure 2D**). The model was more selective for both orientation and direction  
311 than the T4 cell measurements.

312  
313 *The synaptic model reproduces the selectivity of apparent motion responses in T4 cells*

314 In addition to sinusoid gratings, apparent motion stimuli are a useful tool for investigating  
315 direction-selective systems. These stimuli decompose visual motion into summations of simpler  
316 spatiotemporal patterns, which can provide strong intuition into the motion computation (Barlow  
317 and Levick, 1965).

318

319 Electrophysiological measurements of T4 cells have shown fast depolarization and delayed,  
320 offset hyperpolarization in response to a small flashed white bar placed on a gray background  
321 (Gruntman et al., 2018) (**Figure 3A**). The synaptic T4 model displayed qualitatively consistent  
322 responses to the same stimulus (**Figure 3A**). The positive lobe in the model is narrower than in  
323 the electrophysiological recording; this is likely because the true central input to T4 has a wider  
324 receptive field than in our model (Behnia et al., 2014; Takemura et al., 2013). Consistent with  
325 electrophysiology, the OFF input to the T4 model is not visible under this analysis because it was  
326 rectified with a threshold at mean gray (zero contrast).

327  
328 Since the synaptic model reproduced T4 cell voltage responses to flashed bars, we sought to  
329 characterize its responses to apparent motion stimuli composed of pairs of bars offset in  
330 spacetime (Salazar-Gatzimas et al., 2018). These stimuli can induce in humans and in flies the  
331 “reverse-phi” motion illusion, in which a reversal of contrast polarity induces a motion percept in  
332 the direction opposite the stimulus displacement (Anstis, 1970; Clark et al., 2011; Hassenstein  
333 and Reichardt, 1956). We aligned these stimuli so that the temporally-delayed bar is placed at the  
334 center of the receptive field (**Figure 3B**) (Salazar-Gatzimas et al., 2018). T4 cells respond  
335 maximally to one phi and one reverse-phi apparent motion stimulus out of eight possible pairings  
336 (Salazar-Gatzimas et al., 2018). The synaptic model reproduced this selectivity (**Figure 3C-D**).

337  
338 Various groups have assessed nonlinear enhancement or suppression of PD and ND apparent  
339 motion stimuli relative to linear decompositions. This analysis can be misleading because it does  
340 not allow one to uniquely characterize the nonlinearity as ‘enhancing’ or ‘suppressing’, since  
341 there exist an infinite number of linear decompositions of a given stimulus (Salazar-Gatzimas et  
342 al., 2018). Despite this difficulty, such analyses have been applied as an intuitive way to try to  
343 understand direction-selective computations (Barlow and Levick, 1965; Fisher et al., 2015;  
344 Gruntman et al., 2018; Haag et al., 2016).

345  
346 In T4 cells, an analysis of responses to sequential bars has indicated that calcium signals include  
347 both PD enhancement and ND suppression relative to a linear prediction from the responses to  
348 individual bars (Haag et al., 2016) (**Figure 3E**). Our model failed to reproduce this result,  
349 showing only suppression of ND motion under this analysis (**Figure 3E**). This discrepancy could

350 be influenced by the timescale of this stimulus, which is far longer than the 150 ms offset used in  
351 the apparent motion stimuli in (**Figure 3C-D**). Additionally, previous theoretical work has  
352 shown that disinhibition can generate PD enhancement in similar models (Borst, 2018; Torre and  
353 Poggio, 1978); the choice of thresholds in this model did not permit flanking disinhibition with  
354 ON stimuli.

355

356 *The synaptic model does not reproduce the fast timescale tuning of T4 cells*

357 A third approach to characterizing direction-selective signals has been to apply stochastic stimuli  
358 with specified correlation structure. Responses to uncorrelated stimuli can be used to generate an  
359 unbiased estimate of a system's linear receptive field (Chichilnisky, 2001). By using reverse-  
360 correlation and uncorrelated stimuli to extract spatiotemporal receptive fields, T4 cells have been  
361 characterized by oriented linear receptive fields with a central excitatory lobe and a delayed,  
362 offset inhibitory lobe (**Figure 4A**) (Leong et al., 2016; Salazar-Gatzimas et al., 2016). The T4  
363 synaptic model generates the same shape of receptive field (**Figure 4A**). However, in the model,  
364 the inhibitory lobe lasts longer than that measured in T4 cells, and the tuning of the model was  
365 slower overall.

366

367 Responses to stochastic stimuli containing precise pairwise spatiotemporal correlations have  
368 revealed fast-timescale tuning in T4 cells (Salazar-Gatzimas et al., 2016). In measurements of T4  
369 and T5, the cells could discriminate between spatiotemporal correlations with delays of 0 and 15  
370 ms (**Figure 4B**). We presented the synaptic model with stimuli containing pairwise  
371 spatiotemporal correlations at different temporal delays. The model was direction-selective and  
372 responded to both positive and negative correlations, as in the cellular measurements. However,  
373 the model did not reproduce the fast timescale discrimination between delays (**Figure 4B**).  
374 Furthermore, the synaptic model showed strong suppression of ND-oriented positive correlations  
375 and enhancement of ND-oriented negative correlations, which was not observed in the data.

376

377 Behaving *Drosophila* respond direction-selectively to correlations higher than second-order  
378 (Clark et al., 2014; Leonhardt et al., 2016). This cannot be explained by models that compute  
379 pairwise correlations in the stimulus, such as the HRC and motion energy model. The sensitivity  
380 to higher-order correlations has been assessed using three-point glider stimuli, which contain

381 precise third-order correlations (Hu and Victor, 2010) (**Figure 4C**). The net responses of T4 cells  
382 to these stimuli have previously been inferred from behavioral measurements in *Drosophila* with  
383 the synaptic outputs of T5 cells silenced, using gliders updated at 24 Hz (Leonhardt et al., 2016).  
384 We used *in vivo* two-photon calcium imaging to measure directly the responses of T4 cells to  
385 three-point gliders updated at 5 Hz, and found that the signs of the net responses were consistent  
386 with those measured in behavior with T5 cells silenced (**Figure 4C**, see **Methods** and **Appendix**  
387 **A** for details).

388  
389 With an update rate of 24 Hz, the synaptic model correctly predicted the signs of net responses to  
390 diverging gliders measured in imaging and behavior, but predicted the wrong converging glider  
391 responses (**Figure 4C**). At 5 Hz, the synaptic model correctly predicted the signs of both  
392 converging and diverging glider responses, but not the relative magnitudes. Thus, the glider  
393 responses in T4 appear relatively insensitive to the glider timescale (24 vs. 5 Hz), but the  
394 model's response depends strongly on the input timescales.

395  
396 T4 and T5 cells have been shown to display strongly direction-selective responses to rigidly-  
397 translating stimuli consisting of black and white squares placed at random on a gray background  
398 (see **Appendix A**) (Badwan et al., 2019). When two such stimuli that move in opposite  
399 directions are superimposed, they generate transparent motion percepts in primates (Qian et al.,  
400 1994), and they generate responses in T4 that are reduced compared to presenting PD stimuli  
401 alone (Badwan et al., 2019). The synaptic model qualitatively reproduced these responses  
402 (**Figure 4D**). In particular, the responses of T4 cells are suppressed more strongly under the  
403 addition of ND motion than under the addition of OD motion, a feature that is reproduced by the  
404 synaptic T4 model (**Figure 4D**). Therefore, as in T4 cells, the selective direction-opponency  
405 observed in the model persists even with stimuli containing multiple spatiotemporal frequencies.

406  
407 *The T4 synaptic model provides decorrelated channels for naturalistic motion*  
408 Beyond artificial stimuli, natural scenes have been used to investigate the performance of  
409 direction-selective signals generated by models, behavior, and neurons (Badwan et al., 2019;  
410 Chen et al., 2019; Dror et al., 2001; Fitzgerald and Clark, 2015; Leonhardt et al., 2016; Salazar-  
411 Gatzimas et al., 2018; Straw et al., 2008). We therefore sought to investigate the performance of

412 the T4 synaptic model in natural motion processing. To do so, we presented it with rigidly-  
413 translating scenes from a database of natural images (see **Appendix A, Figure 5A**) (Meyer et al.,  
414 2014) (Badwan et al., 2019; Chen et al., 2019; Fitzgerald and Clark, 2015; Meyer et al., 2014;  
415 Salazar-Gatzimas et al., 2018). Though the structure and properties of inputs to T5 cells are  
416 known to differ from the inputs to T4 (Serbe et al., 2016; Shinomiya et al., 2019), to make an  
417 OFF-edge selective channel we created a ‘T5’ model by simply inverting the ON/OFF selectivity  
418 of the inputs to our T4 synaptic model. This is intended merely to be an OFF-selective channel  
419 for the purposes of comparing T4 and potential T5 cell responses. The resulting four channels  
420 displayed strongly direction-selective average responses to translating natural scenes (**Figure**  
421 **5B**).

422  
423 Measured responses of T4 and T5 cells to translating natural scenes are decorrelated, so that only  
424 one channel is active at once (Salazar-Gatzimas et al., 2018). The synaptic models of T4 and  
425 ‘T5’ also generated highly decorrelated responses, with the coactivation matrix of the four  
426 channels being nearly diagonal (**Figure 5C**). Such decorrelated parallel channels may provide a  
427 convenient representation of motion signals (Salazar-Gatzimas et al., 2018).

428

## 429 **Discussion**

430

431 An anatomically constrained synaptic model suffices to reproduce many, but not all, of the  
432 properties of *Drosophila* T4 cells. This model reproduces the direction-opponency, temporal-  
433 frequency-tuning, orientation-tuning, and phi/reverse-phi selectivity measured in T4 cells  
434 (**Figures 2-4**). When applied to a naturalistic velocity estimation task, it produces decorrelated  
435 signals similar to those measured in T4 and T5 neurons (**Figure 5**). However, it fails to  
436 reproduce the PD enhancement and fast-timescale tuning observed in T4 cells (**Figures 3-4**).  
437 Moreover, though it is sensitive to triplet correlations in its input, it fails to reproduce them on  
438 the same timescales as observed in the data (**Figure 4**). In short, this simple synaptic model is  
439 sufficient to reproduce several distinct properties of T4 cells, but cannot account for several  
440 observations.

441



442 *Minimal models and levels of understanding*

443 Here, we asked whether a minimal synaptic model could qualitatively reproduce features of T4  
444 cell responses. The minimal model required no exotic neurotransmitter receptors or interactions,  
445 and was based on simple synaptic conductances. The simplifications sufficient to explain  
446 different phenomena will depend strongly on the features one seeks to reproduce, and on the  
447 desired level of fidelity. However, minimal models are useful precisely because they can be  
448 relatively straightforward to analyze.

449  
450 Marr famously proposed different levels of understanding neural circuitry, including an  
451 algorithmic level and a mechanistic level (Marr and Poggio, 1976). As we drive towards a deeper  
452 understanding of the visual motion circuit in the fly, the levels of algorithm and mechanism can  
453 appear increasingly blurred. It is hard to define what distinguishes the mechanistic circuit  
454 description presented here from a detailed algorithm-level description of the computation.  
455 However, it remains important to connect proposed mechanistic models to high-level  
456 descriptions of the system such as the HRC. This is because the high-level descriptions of  
457 computations provide a level of intuition for the behavior of the system that a more intricate  
458 model cannot. Moreover, the HRC explains a wide variety of neural and behavioral data in flies  
459 (Borst and Egelhaaf, 1989; Yang and Clandinin, 2018), so an HRC-like algorithm must be a  
460 limiting case of any proposed mechanistic model (Potters and Bialek, 1994).

461  
462 *Sufficiency of models*

463 Many details of the function of the early visual system were neglected in this model. For  
464 instance, the filter shapes in neurons leading into the model T4 cell have been well-characterized  
465 (Arenz et al., 2017; Behnia et al., 2014), but this model used simple exponential filters. Lateral  
466 inhibition is widely documented in the early fly visual system (Arenz et al., 2017; Freifeld et al.,  
467 2013; Meier et al., 2014), but this model used simple Gaussian spatial acceptance functions  
468 without lateral inhibition. The synapses that feed into the medulla neurons that synapse onto T4  
469 are likely to have complex, nonlinear processing properties (Yang et al., 2016), yet we modelled  
470 the entire input pathway as a purely linear filter. The rectifications of neural responses upstream  
471 of T4 are imperfect (Behnia et al., 2014; Salazar-Gatzimas et al., 2018), but this model used  
472 simple threshold-linear rectifiers. The fly eye possesses neurons that feedback onto earlier stages



473 and create reciprocal interactions between neurons (Takemura et al., 2013; Takemura et al.,  
474 2017), but this model is entirely feedforward.

475  
476 Despite these approximations, the synaptic T4 model presented here is sufficient to qualitatively  
477 match a variety of T4 neuron responses. Adding some of these neglected details into a model  
478 may make it sufficient to reproduce other features of T4 responses. This provides a method for  
479 understanding which details of processing are related to which response features in T4 cells: one  
480 may ask how different details of the system affect the sufficiency of a model to reproduce  
481 specific downstream response properties. As the field acquires more and more detailed  
482 information about the motion detection circuitry, this sort of analysis will be critical to  
483 understand the functional role of different properties.

484  
485 One might naturally ask whether the synaptic model presented here might be further simplified  
486 without sacrificing its ability to account for the response properties of T4 cells. As described in  
487 **Appendix C**, a simplified linear-nonlinear cascade (LNLN) representing the numerator of the  
488 biophysical nonlinearity can generate some, but not all, of the properties of the full model.

489  
490 *Flexibility in extending this minimal synaptic model*

491 In selecting parameter values for this synaptic model, we sought to reproduce only a few  
492 properties of T4 cells: a temporal frequency maximum of 1 Hz and a direction-opponent average  
493 responses to sinusoid gratings with a temporal frequency of 1 Hz and a spatial wavelength of 45°  
494 (**Appendix B**) (Badwan et al., 2019). To capture a larger subset of the measured properties of T4  
495 cells, one could optimize the parameters of the model capture many response properties (Deb,  
496 2014). Such a solution would provide information about the maximal ability of this synaptic  
497 model to reproduce the properties of T4 cells, but it seems unlikely to provide insight into the  
498 predictive power of the core features of the model.

499  
500 The organization of this model allows for several clear tuning mechanisms. First, the temporal  
501 filters could be modified to better match measured filters (**Figure 2**). Second, the degree to  
502 which inhibition is shunting or hyperpolarizing can be adjusted by changing the reversal  
503 potential of inhibitory currents. This could effectively hide inhibition under some stimuli and

504 measurements. Third, it is clear that to better represent preferred direction enhancement, the  
505 threshold for the OFF-inhibitory input could be changed (**Figure 3**) (Borst, 2018). This would  
506 allow disinhibition of Mi4 to change the gain for the central input.

507  
508 In the model analyzed here, we chose all thresholds of the input LN models to be zero. This  
509 effectively ignores contrast asymmetries in the natural world (Geisler, 2008), which have been  
510 used to understand many functional properties of motion detectors in flies (Chen et al., 2019;  
511 Clark et al., 2014; Fitzgerald and Clark, 2015; Fitzgerald et al., 2011; Leonhardt et al., 2016;  
512 Salazar-Gatzimas et al., 2018). Changing these thresholds to optimize for natural scene motion  
513 estimation might also generate a parameter set that better captures responses to triplet  
514 correlations (**Figure 4**) (Fitzgerald and Clark, 2015). In short, the synaptic model presented here  
515 is highly flexible and extensible, and uses only simple, known biophysical mechanisms.

516  
517 For the sake of simplicity, we have used single delay and non-delay lines in this work (**Figure**  
518 **1A**). However, T4 cells receive fast excitatory input at the center of their receptive fields from  
519 both Mi1 and Tm3 cells, and delayed OFF inhibitory input offset in the PD from both Mi4 and  
520 CT1 cells (Shinomiya et al., 2019; Takemura et al., 2017). Dissecting how information from  
521 these parallel channels is used, particularly if it is nonlinearly combined, will be important in  
522 developing a full understanding of the direction-selective computation performed by T4 cells.

523  
524 *Modelling temporal processing*

525 The model presented here failed to capture some of the fast-timescale tuning measured in T4,  
526 including in its responses to pairwise and triplet spatiotemporal correlations (**Figure 4**). In this  
527 minimal model, we represented all temporal processing by linear filters. However, the temporal  
528 processing upstream of T4 cells involves nonlinear and adaptive mechanisms, which can affect  
529 temporal response properties (Howard et al., 1984; Zheng et al., 2006). Thus far, the study of  
530 nonlinear mechanisms in the fly visual system has focused on static nonlinear effects such as  
531 rectification (Behnia et al., 2014; Yang et al., 2016) and on nonlinear interactions between  
532 linearly filtered signals (Borst et al., 2005; Fitzgerald and Clark, 2015). The inclusion of  
533 nonlinear effects on the dynamics themselves may be necessary to accurately capture the  
534 temporal processing upstream of T4 cells. As a first step towards experimentally understanding

535 adaptation in this circuit, one might characterize the temporal kernels of the inputs to T4 cells  
536 with high resolution (Mano et al., 2019; Yang et al., 2016) and study how their properties depend  
537 on stimulus statistics and history (Baccus and Meister, 2002; Kim and Rieke, 2001; Rieke,  
538 2001). Only a few models have focused on these sorts of changes in processing dynamics (Clark  
539 et al., 2013). Though the analysis of dynamic temporal nonlinearities is complex, incorporating  
540 them into models may provide insight into how fast timescale tuning of T4 cells arises.

541

#### 542 *A T5 synaptic model*

543 In this work, we used a sign-inverted version of our T4 synaptic model to represent the OFF-  
544 edge-selective T5 cells. This representation would correspond to a first-order direction-selective  
545 cell that receives OFF excitatory input at the center of its receptive field, delayed OFF inhibitory  
546 input offset in its preferred direction, and delayed ON input offset in the null direction. Such a  
547 model would correctly predict the selective responses of T5 cells to phi and reverse-phi apparent  
548 motion stimuli (Salazar-Gatzimas et al., 2018). However, the functional and anatomical structure  
549 of the inputs to T5 cells suggests that it receives only OFF inputs (Serbe et al., 2016; Shinomiya  
550 et al., 2019). Somehow, however, signals in T5 cells are sensitive to both contrast increments and  
551 decrements (Salazar-Gatzimas et al., 2018; Wienecke et al., 2018). Further study of the physical  
552 and functional connectome of the OFF-edge motion pathway, will be required to elucidate how  
553 the direction-selective computations in T4 and T5 cells differ.

554

#### 555 *Relationships to mammalian visual systems*

556 The organization of the fly's visual motion detection circuits bear striking similarities to those in  
557 mammalian retina in their anatomy, circuitry, and algorithmic processing (Borst and  
558 Helmstaedter, 2015; Clark and Demb, 2016; Sanes and Zipursky, 2010). In mammalian retina,  
559 the earliest direction-selective signals are generated by starburst amacrine cells (SACs), which  
560 are also tuned to ON- and OFF-edges (Euler et al., 2002; Famiglietti Jr, 1983). It appears that  
561 SACs may receive inputs that are differentially delayed (Fransen and Borghuis, 2017; Kim et al.,  
562 2014), similar to the inputs to T4 cells. It would be interesting to investigate how much SAC  
563 phenomenology that mechanism alone could account for, when linked to simple biophysical  
564 mechanisms. As in this study, it could provide insight into where the circuit understanding is  
565 lacking, especially when complex stimuli are used to probe SAC function (Chen et al., 2016).

566

567 It is notable that the ON-ON-OFF spatial organization of T4 inputs (**Fig. 1A**) is almost identical  
568 to a model proposed to explain cortical responses to pairwise correlations (Mo and Koch, 2003).  
569 This suggests there may be deep parallels between T4 and T5 and cortical motion processing  
570 steps. Models for fly and cortical direction-selectivity have traditionally differed in whether they  
571 assume discrete inputs (fly, HRC-like models) or more continuous inputs (cortex, motion-  
572 energy-like spatiotemporal filtering). If synaptic interactions are considered, then continuous  
573 linear filters cannot be applied, and models must incorporate the discrete receptive fields of the  
574 inputs to a cell. It would be interesting to ask how such conductance models fare in predicting  
575 cortical responses; the statistical nature of cortical connections make it more difficult to make a  
576 general model of this type.

577

578 In this synaptic model of T4 cell function, we have paired known connectivity with measured  
579 physiology and simple biophysics to predict many circuit processing properties. This allows us to  
580 define where such a model succeeds and where it fails. This represents progress towards the  
581 ultimate goal of understanding this circuit at all levels, from utility to algorithm to mechanism.

582

### 583 **Author contributions**

584 JAZV and DAC conceived of numerical experiments. JAZV performed numerical simulations  
585 and analyzed the model. BAB acquired calcium imaging data. JAZV and DAC wrote the paper.

586

### 587 **Acknowledgements**

588 We thank J. E. Fitzgerald and members of the Clark lab for helpful conversations. DAC and this  
589 research were supported by NIH R01EY026555, NIH P30EY026878, NSF IOS1558103, a  
590 Searle Scholar Award, a Sloan Fellowship in Neuroscience, the Smith Family Foundation, and  
591 the E. Matilda Ziegler Foundation.

592 **Figure Legends**

593

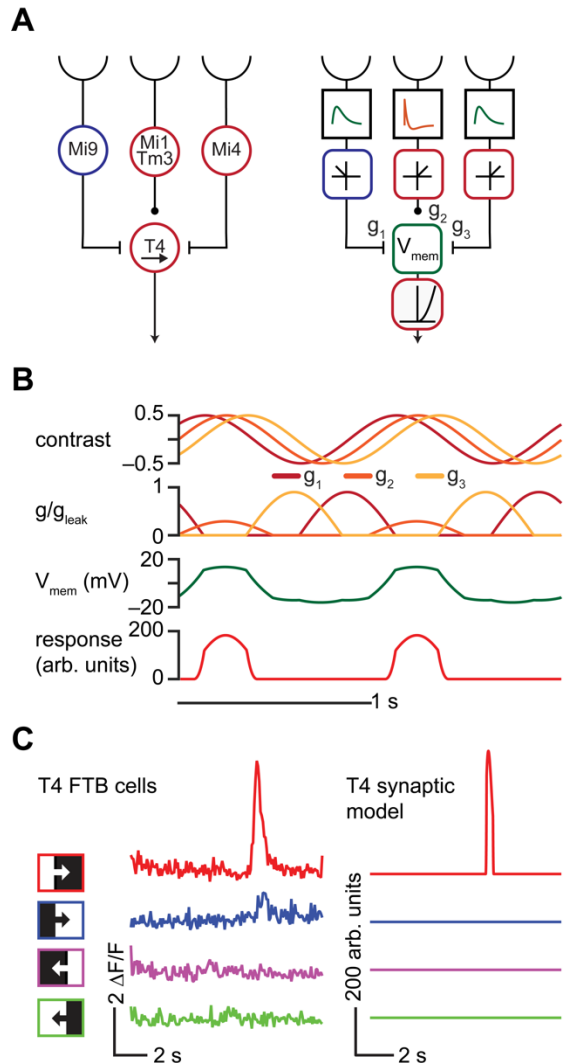

594 **Figure 1**, Zavattone-Veth et al. (2019)

595 **Figure 1: An anatomically constrained synaptic model for T4 cells.**

596 A. *Left*: Diagram of proposed inputs to *Drosophila* T4 first-order direction-selective cells  
 597 based on anatomical and physiological measurements. Mi1 and Tm3 cells provide ON  
 598 excitatory input at the center of the receptive field of each T4 cell, while Mi9 provides  
 599 delayed OFF inhibitory input offset in the null direction, and Mi4 provides delayed ON  
 600 inhibitory input offset in the preferred direction. *Right*: Synaptic model based on the  
 601 anatomical structure shown at left.

- 602 B. Responses of each component of the synaptic model to a 1 Hz, 45° sinusoidal grating  
603 drifting in the preferred (rightward) direction. *Top*: Input contrasts to each of the three  
604 presynaptic units of the model. *Upper middle*: Conductances of excitatory and inhibitory  
605 currents corresponding to each input in response to the sinusoidal stimulus. *Lower*  
606 *middle*: Membrane voltage. *Bottom*: Calcium signal.
- 607 C. *Left*: Responses of T4 cells sensitive to front-to-back (FTB) motion to ON and OFF  
608 edges moving FTB and back-to-front (BTF) at 30°/s, measured using two-photon calcium  
609 imaging (data from (Salazar-Gatzimas et al., 2016)). *Right*: As at left, but for the T4  
610 synaptic model.  
611

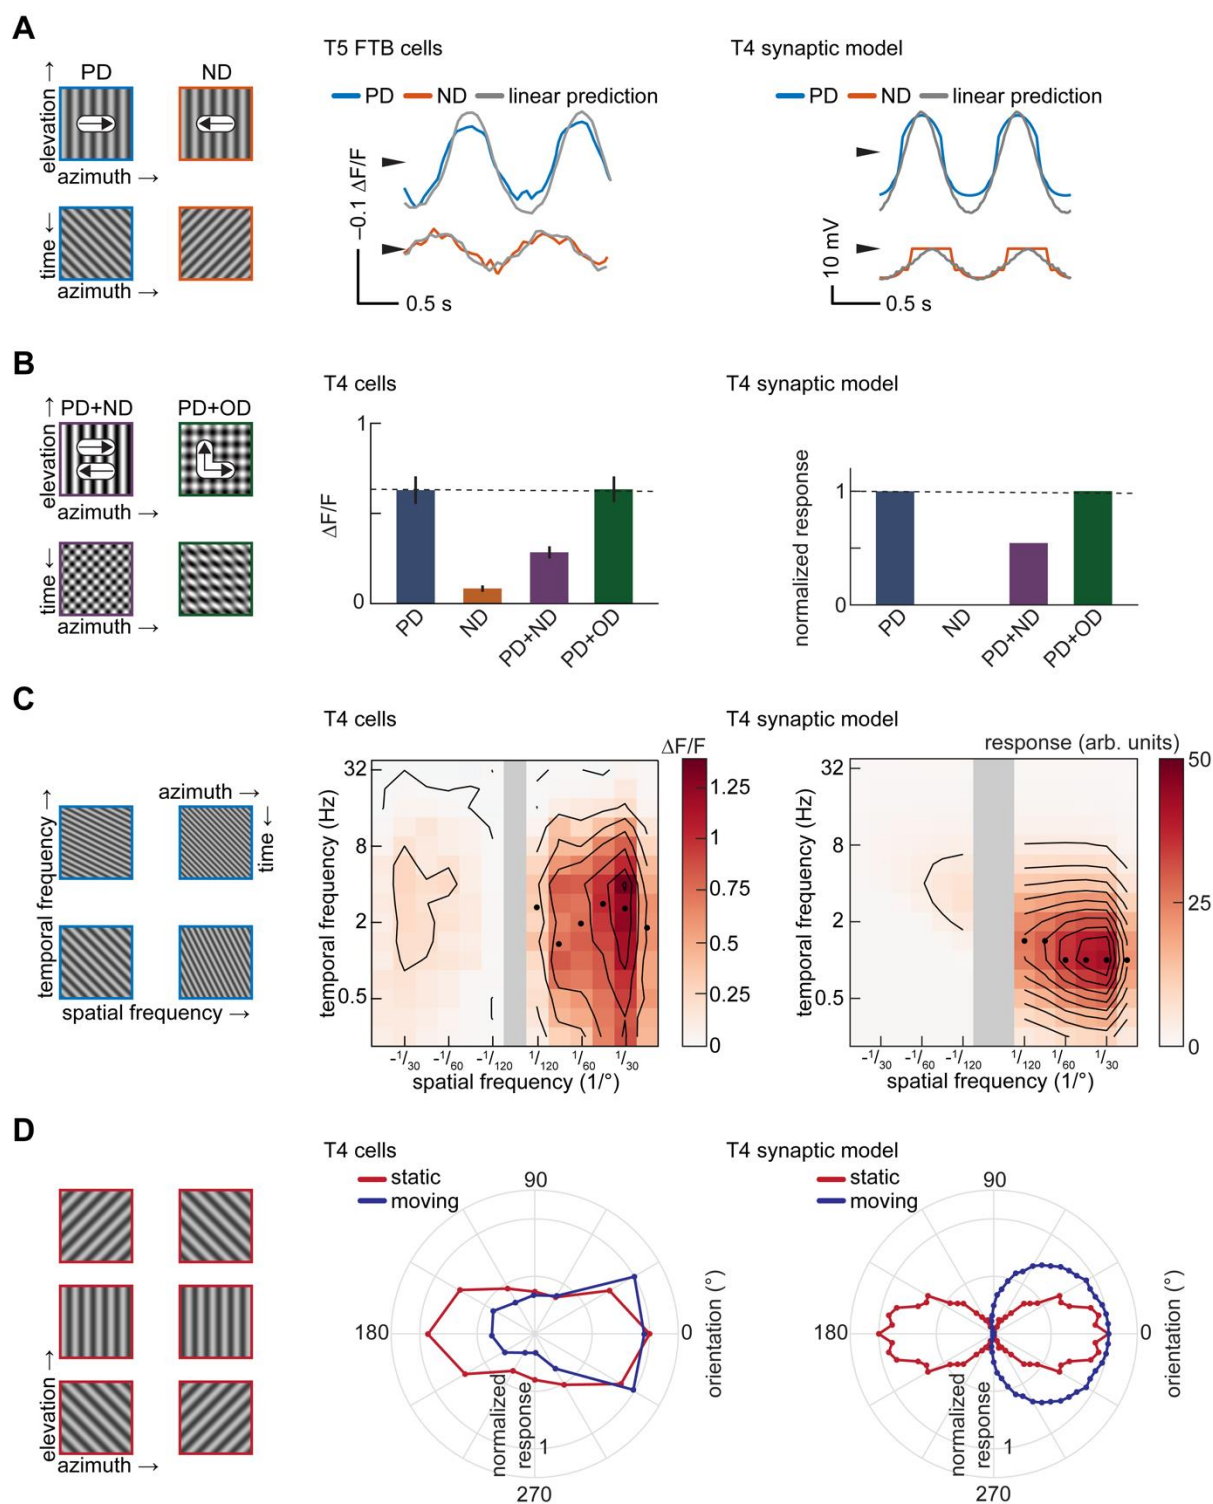

612 **Figure 2**, Zavatone-Veth et al. (2019)



613 **Figure 2: The T4 synaptic model reproduces sinusoidal grating responses measured in T4**  
614 **cells.**

- 615 A. *Left:* Images and kymographs of sinusoid gratings drifting in the preferred (PD) and null  
616 (ND) directions. *Center:* Membrane voltage of T5 FTB cells to 1 Hz, 25° drifting gratings  
617 compared with linear predictions from contrast-modulated counterphase gratings,  
618 measured using voltage indicators (data from (Wienecke et al., 2018)). *Right:* As at  
619 center, but for voltage responses of the T4 synaptic model. The model has coefficients of  
620 determination for PD and ND of 0.92 and 0.82.
- 621 B. Mean responses to 1 Hz, 45° sinusoid gratings. *Left:* Images and kymographs of  
622 composite sinusoid gratings containing PD and ND motion or PD and orthogonal  
623 direction (OD) motion. *Center:* Mean responses of T4 cells to drifting gratings, measured  
624 using a calcium indicator (data from (Badwan et al., 2019)). Error bars indicate  $\pm 1$  SEM.  
625 *Right:* As at center, but for calcium responses of the T4 synaptic model.
- 626 C. Spatiotemporal frequency tuning. *Left:* Kymographs of sinusoid gratings with varying  
627 spatiotemporal frequency content. *Center:* Spatiotemporal frequency tuning of T4 cells  
628 (data from (Creamer et al., 2018)). Black circles indicate the temporal frequency at which  
629 the maximum response at a given spatial frequency is attained. *Right:* As at center, but  
630 for the T4 synaptic model.
- 631 D. Orientation and direction tuning. *Left:* Images of oriented sinusoid gratings. *Center:*  
632 Orientation tuning of T4 and T5 cells with static gratings (data from (Fisher et al., 2015))  
633 and direction tuning of T4 cells with drifting gratings (data from (Maisak et al., 2013)).  
634 The orientation of a static grating is defined by the vector normal to the apparent edges,  
635 the same definition as for moving gratings (see **Appendix A**). *Right:* As at center, but for  
636 the T4 synaptic model.  
637



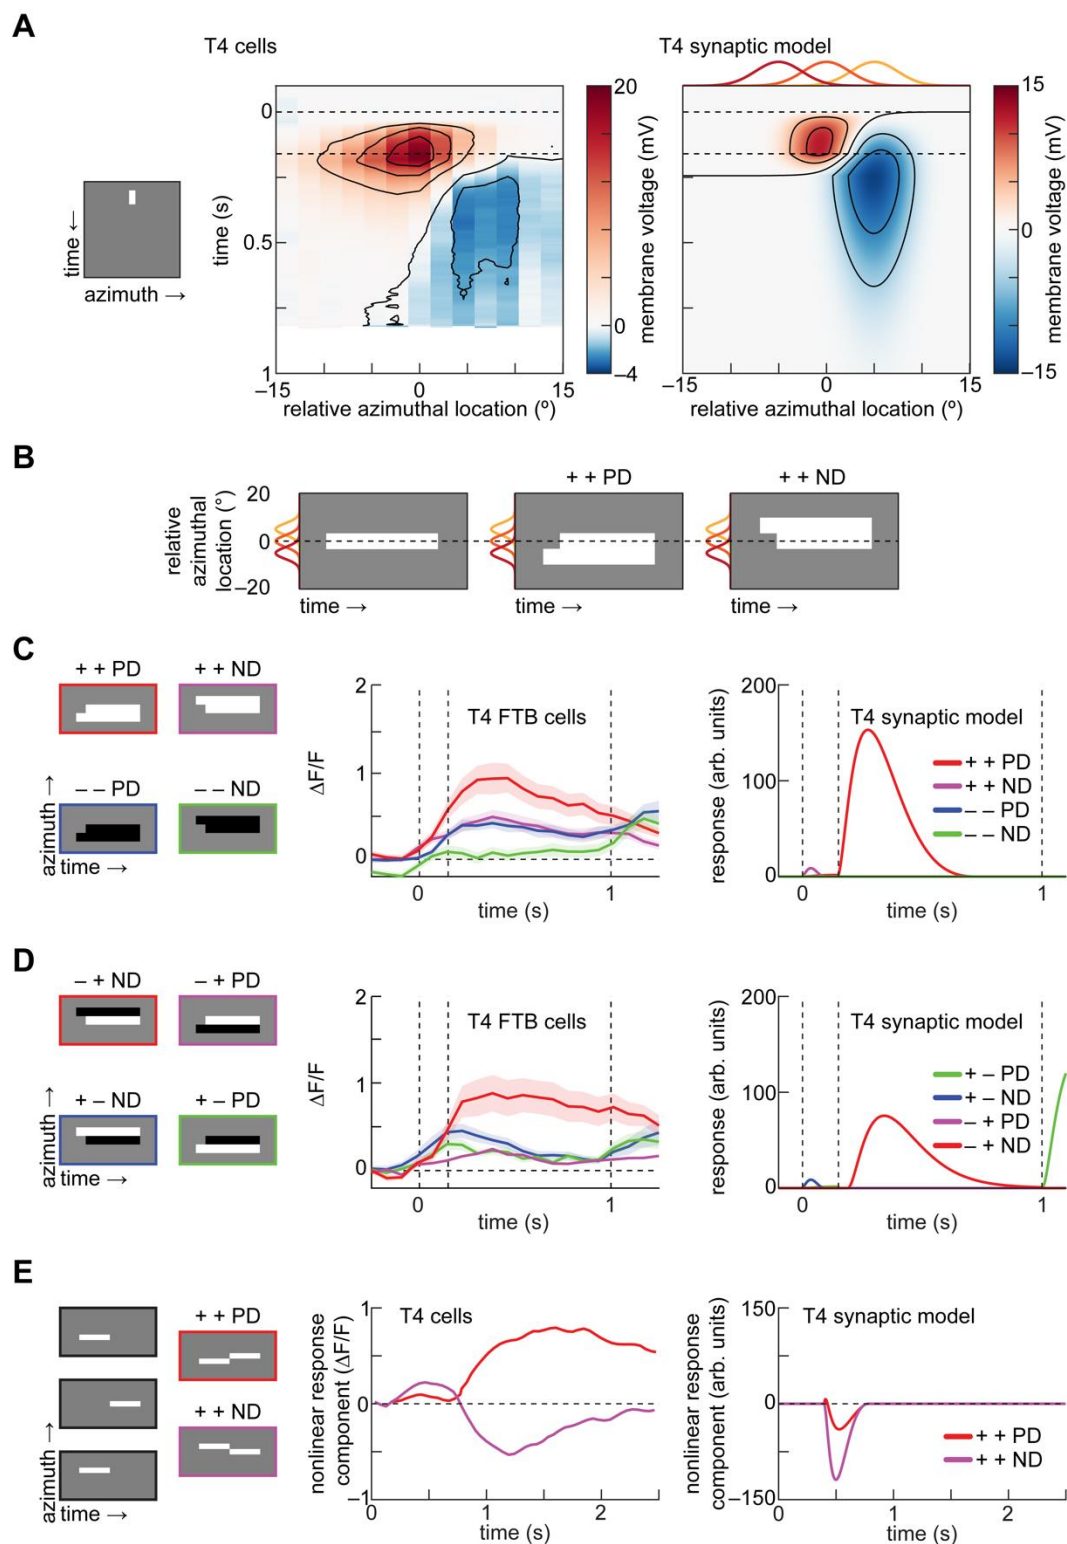

638 **Figure 3**, Zavatore-Veth et al. (2019)

639 **Figure 3: The T4 synaptic model reproduces the spatial organization and selectivity of**  
640 **apparent motion responses in T4 cells.**

- 641 A. Responses to a single white bar flashed at different spatial locations. *Left*: Kymograph of  
642 2° white bar presented for 160 ms. *Center*: Membrane voltage of T4 cells to flashed white  
643 bars, measured using electrophysiology (data from (Gruntman et al., 2018)). *Right*: As at  
644 center, but for the T4 synaptic model. Red, orange, and yellow lines indicate the spatial  
645 acceptance functions of the three model inputs.
- 646 B. Apparent motion stimuli are aligned such that the lagging bar is located at the center of  
647 the receptive field (Salazar-Gatzimas et al., 2018). The leading bar is presented at time  
648 zero and lasts for 1 second, and the lagging bar is presented 150 ms later. Each bar  
649 subtends 5° of visual angle. Red, orange, and yellow lines indicate the spatial acceptance  
650 functions of the three inputs.
- 651 C. Responses to phi apparent motion stimuli, aligned as in (B). *Left*: Kymographs of all four  
652 possible phi apparent motion stimuli. *Center*: Responses of T4 FTB cells to all four phi  
653 apparent motion stimuli, measured using two-photon calcium imaging (data from  
654 (Salazar-Gatzimas et al., 2018)). Error patches indicate  $\pm 1$  SEM. *Right*: As at center, but  
655 for the T4 synaptic model.
- 656 D. As in (C), but for reverse-phi apparent motion stimuli, in which the sequentially  
657 presented bars have opposite contrasts.
- 658 E. Assessing PD enhancement and ND suppression. *Left*: Kymographs of linear  
659 decomposition of flashed apparent motion stimuli, with 4.5°-wide white bars presented  
660 sequentially for 400 ms each. *Center*: Nonlinear response component, defined as the  
661 residual of the linear prediction, measured using a calcium indicator (data from (Haag et  
662 al., 2016)). *Right*: As at center, but for the T4 synaptic model.
- 663

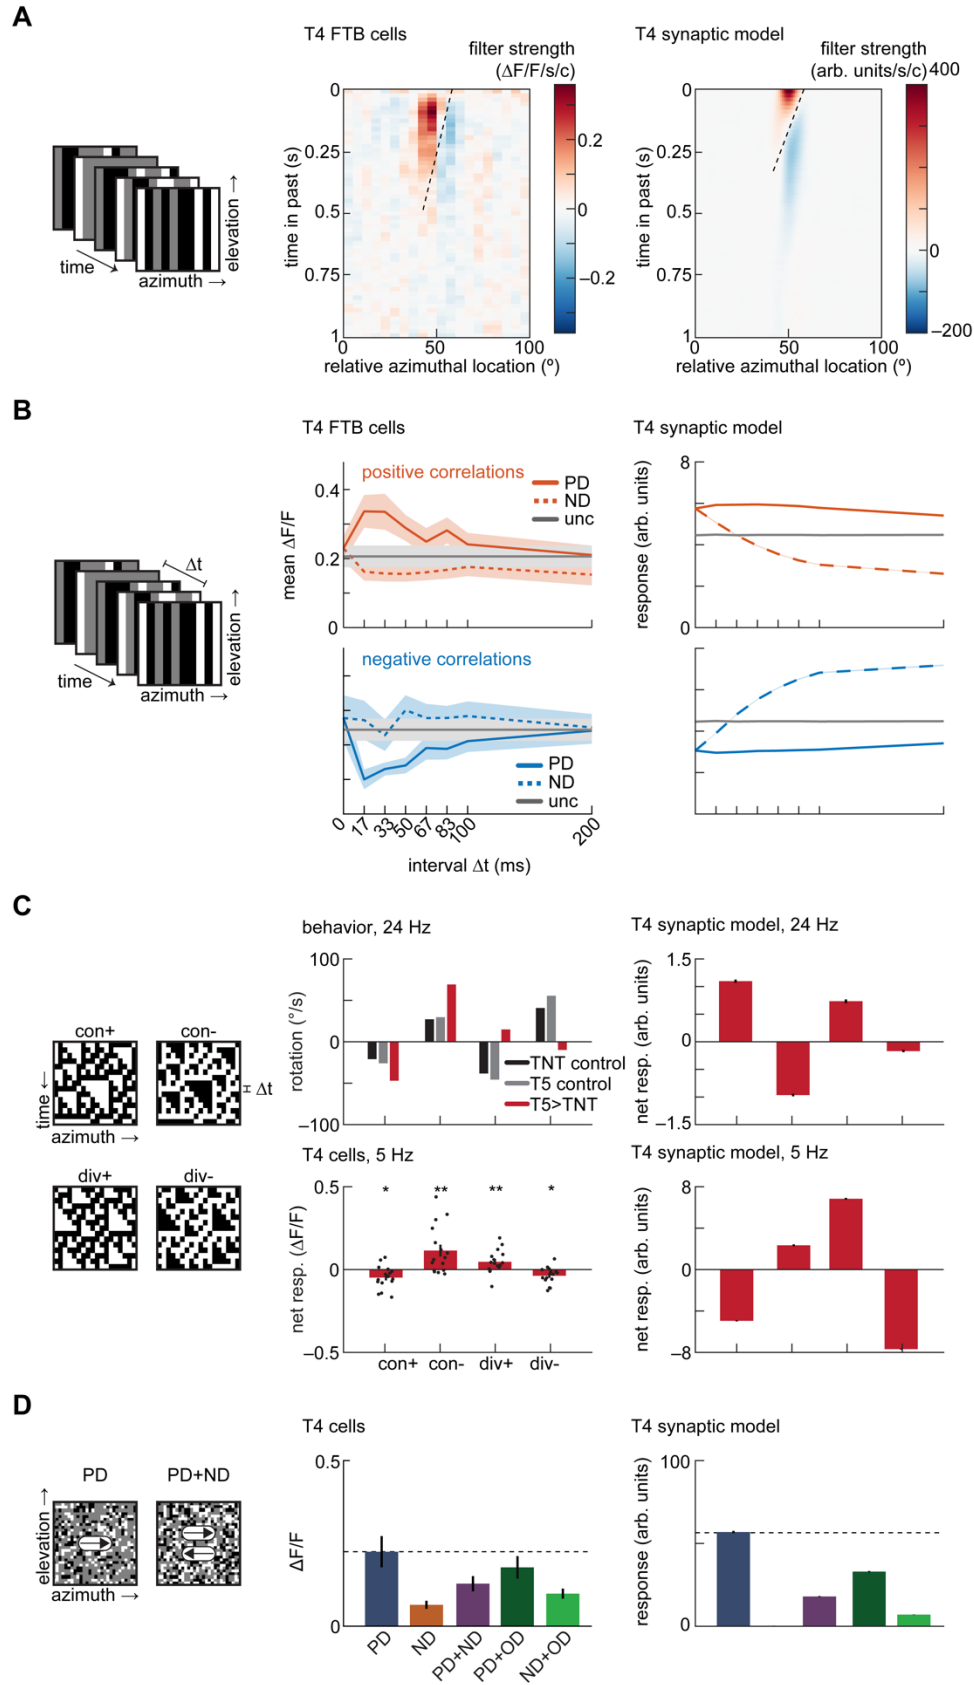

665 **Figure 4: The minimal T4 synaptic model is not sufficient to reproduce the fast-timescale**  
666 **tuning of T4 cells.**

- 667 A. Linear receptive field measurements. *Left:* Schematic depiction of binary, uncorrelated  
668 spatiotemporal noise. *Center:* Linear receptive field of T4 FTB cells (data from (Salazar-  
669 Gatzimas et al., 2016)). *Right:* As at center, but for the T4 synaptic model.
- 670 B. Correlation interval receptive field measurements. *Left:* Schematic depiction of ternary  
671 noise containing pairwise correlations at a specified interval  $\Delta t$ . *Center:* Responses of T4  
672 FTB cells to positive and negative correlations, measured using a calcium indicator (data  
673 from (Salazar-Gatzimas et al., 2016)). Error bars indicate  $\pm 1$  SEM. *Right:* As at center,  
674 but for the T4 synaptic model. Error patches, which are barely visible, indicate 95%  
675 confidence intervals of the mean, which is variable due to the stochastic stimulus.
- 676 C. Triplet correlation sensitivity. *Left:* Kymographs of three-point glider stimuli containing  
677 positive and negative triplet correlations. *Center top:* Turning behavioral responses to  
678 three-point gliders updated at 24 Hz of flies with the synaptic outputs of T5 cells silenced  
679 (data from (Leonhardt et al., 2016)). Positive rotations correspond to the direction of the  
680 displacement of the spatial mean location of each triplet. *Center bottom:* Net responses of  
681 T4 cells to three-point gliders updated at 5 Hz, measured using a calcium indicator (see  
682 **Methods**). Asterisks indicate that median net response differs from zero at the  $p < 0.05$   
683 (\*) or  $p < 0.01$  (\*\*) level by a Wilcoxon signed-rank test with  $N = 16$  flies. Exact  $p$ -  
684 values are  $p = 0.0174, 0.0061, 0.0097, \text{ and } 0.0131$  for con+, con-, div+, and div-,  
685 respectively. Error bars indicate  $\pm 1$  SEM over flies, and black circles indicate individual  
686 per-fly means. *Right:* As at center, but for the T4 synaptic model. Error bars indicate 95%  
687 confidence intervals of the mean.
- 688 D. Responses to rigidly translating stimuli with stochastic checkerboard patterns. *Left:*  
689 Images of random checkerboard stimuli. *Center:* Mean responses of T4 cells to  
690 checkerboard stimuli translating at  $100^\circ/\text{s}$ , measured using a calcium indicator (data from  
691 (Badwan et al., 2019)). Error bars indicate  $\pm 1$  SEM. *Right:* As at center, but for the T4  
692 synaptic model. Error bars indicate 95% confidence intervals of the mean.  
693

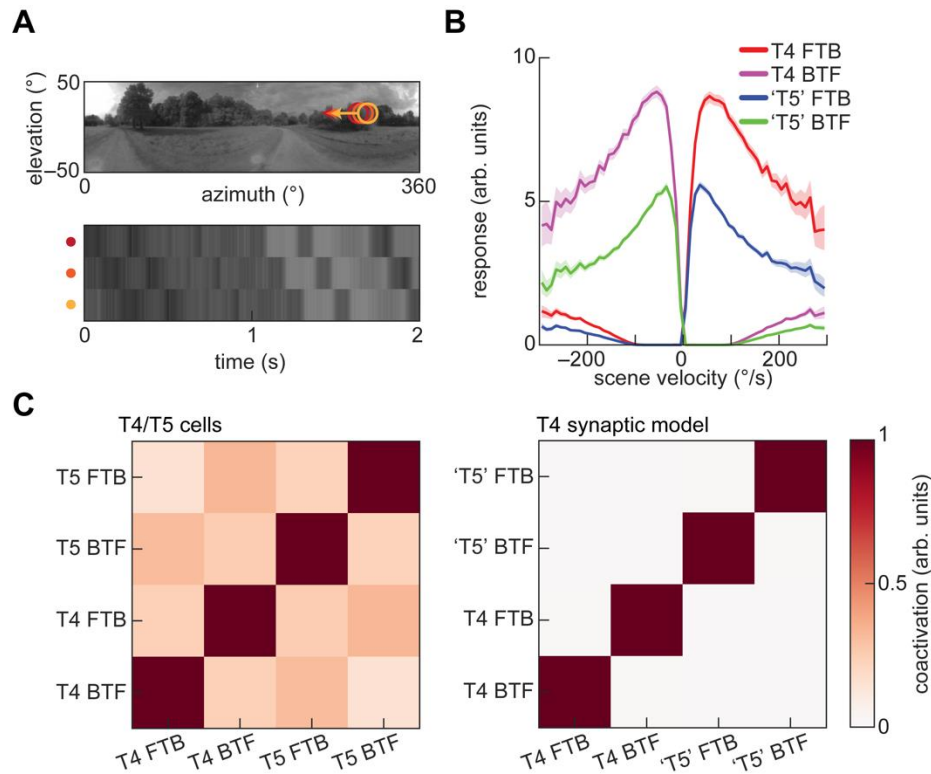

694 **Figure 5**, Zavatore-Veth et al. (2019)

695 **Figure 5: The T4 synaptic model generates decorrelated signals in response to naturalistic**  
696 **motion.**

- 697 A. A rigidly rotating panoramic natural scene, with three spatially offset input signals as a  
698 function of time.
- 699 B. Average responses of the T4 synaptic model and a 'T5' variant to naturalistic motion  
700 constructed by rigidly translating natural scenes at a variety of velocities. Error patches  
701 indicate 95% confidence intervals of the mean. 'T5' cells were constructed by sign-  
702 inverting the inputs to the minimal T4 synaptic model.
- 703 C. Decorrelation of channels with naturalistic motion. *Left*: Coactivation matrix of T4 and  
704 T5 cells in response to rigidly translating natural scenes (data from (Salazar-Gatzimas et  
705 al., 2018)). *Right*: As at left, but for the T4 synaptic model and 'T5' variant. Coactivation  
706 was computed for an ensemble of (image, velocity) pairs, in which the velocity was  
707 chosen from a Gaussian distribution with zero mean and 100°/s standard deviation.  
708

## 709 **Appendix A: Visual stimuli used in simulations and imaging experiments**

710

711 In this appendix, we describe in detail all stimuli used in this work.

712

713 *ON and OFF edges (Figure 1)*

714 ON and OFF edges were constructed by placing white (respectively black) edges on a gray  
715 background. All edges translated at 30°/s.

716

717 *Sinusoid grating stimuli (Figures 1 and 2)*

718 Sinusoid grating stimuli were constructed as in (Badwan et al., 2019; Creamer et al., 2018;  
719 Maisak et al., 2013). Briefly, rightward- and leftward-drifting gratings were constructed as

720

$$721 \quad c(t, x) = c_0 \sin(\omega t \mp \kappa x)$$

722

723 where  $c_0$  is the input contrast,  $\omega$  is the temporal frequency in units of radians per second,  $\kappa$  is the  
724 spatial frequency in units of radians per degree, and the negative sign is taken for rightward-  
725 drifting gratings. To assess whether our model is temporal-frequency-tuned, we computed the  
726 fraction of the total variance in a spatiotemporal frequency sweep of its responses accounted for  
727 by a separable approximation resulting from its singular value decomposition (Creamer et al.,  
728 2018). Counterphase gratings were constructed as

729

$$730 \quad c(t, x) = c_0 \sin(\omega t + \kappa x + \phi_1) + c_0 \sin(\omega t - \kappa x + \phi_2)$$

731

732 where  $\phi_1$  and  $\phi_2$  are uniformly sampled phase offsets, over which we average in all analyses.  
733 Gratings containing preferred- and orthogonal-direction motion were constructed as

734

$$735 \quad c(t, x) = c_0 \sin(\omega t + \kappa x + \phi_1) + c_0 \sin(\omega t + \phi_2)$$

736

737 The linearity analysis in Figure 2A was applied to T5 cells (Wienecke et al., 2018), following a  
738 previously developed protocol (Jagadeesh et al., 1993). This analysis relies upon the fact that a  
739 drifting sinusoid grating may be decomposed into a sum of counterphase gratings as

740

741 
$$c(t, x) = c_0 \sin(\omega t \mp \kappa x) = \frac{c_0}{4} \sum_{n=0}^7 \sin\left(\omega t + \frac{n\pi}{8} \mp \frac{\pi}{2}\right) \sin\left(\kappa x \pm \frac{n\pi}{8}\right)$$

742

743 Therefore, if a system is linear, its scaled, summed response of a linear system to counterphase  
744 gratings with these phase shifts will be equal to its response to the corresponding drifting grating.  
745 By comparing the linear prediction of the drifting grating response to the actual response, one  
746 may assess a system's linearity.

747

748 To assess the orientation- and directional-tuning of the model with sinusoid gratings in Figure  
749 2D, we defined a two-dimensional grating

750

751 
$$c(t, x, y) = c_0 \sin(\omega t - \kappa(x \cos \theta + y \sin \theta))$$

752

753 where the angle  $\theta$  defines its orientation. In this analysis, we assume that the ring of detectors is  
754 located at  $y = 0$ , and that the Gaussian spatial filter is symmetric in  $x$  and  $y$ . Static gratings were  
755 formed by setting  $\omega = 0$ . We note that our convention for the orientation of a static grating  
756 differs from the original manuscript (Fisher et al., 2015); we define the orientation as the angle  
757 between the normal to the apparent edge and the preferred direction rather than the angular  
758 position of the edge itself. Therefore, in our convention the preferred orientations and directions  
759 align.

760

761 *Apparent motion stimuli (Figure 3)*

762 Single-bar stimuli were constructed as previously published (Gruntman et al., 2018; Salazar-  
763 Gatzimas et al., 2018). Briefly, 5° (respectively 2°) black or white bars were placed on a gray  
764 background, and presented for one second (respectively 160 ms) to match (Salazar-Gatzimas et  
765 al., 2018) (respectively (Gruntman et al., 2018)). Bar pair apparent motion stimuli were  
766 constructed as in (Salazar-Gatzimas et al., 2018). Briefly, 5° black or white bars were placed on a  
767 gray background and presented for one second. To create apparent motion, a second black or  
768 white bar was added 150 ms after the onset of the first bar at a neighboring spatial location.  
769 Responses to these bar pair apparent motion stimuli were aligned such that the location of the



770 lagging bar matched the location of peak single-bar responses, as in (Salazar-Gatzimas et al.,  
771 2018). Flashed apparent motion stimuli were constructed similarly to those presented to T4 and  
772 T5 cells in (Gruntman et al., 2018; Haag et al., 2016). Briefly, 4.5° white bars were placed on a  
773 gray background and were presented for 400 ms in sequential spatial positions.

774

775 *Noise stimuli and linear receptive field extraction (Figure 4)*

776 As previously published (Salazar-Gatzimas et al., 2016), we extracted linear receptive fields  
777 from responses to uncorrelated binary stimuli composed of 5° black or white bars, updated at 60  
778 Hz. We estimated the linear receptive field from these responses using reverse correlation  
779 (Chichilnisky, 2001). Ternary noise stimuli with pairwise correlations were constructed as in  
780 (Salazar-Gatzimas et al., 2016). Briefly, the contrast of the correlated noise stimulus was given  
781 as

782

$$783 \quad c(t, x) = \frac{1}{2} (B(t, x) \pm B(t + \delta t, x + \delta x))$$

784

785 where  $B(t, x)$  is an uncorrelated binary stimulus composed of 5° black or white bars, and  
786 addition (respectively subtraction) generates positive (respectively negative) correlations. The  
787 stimulus was updated at a fixed rate, and the temporal offset  $\delta t$  was taken to be one cycle, with  
788 its sign determining whether the stimulus was oriented in the preferred or null direction. The  
789 spatial offset  $\delta x$  was fixed to be one bar width. As shown in (Salazar-Gatzimas et al., 2016), the  
790 autocorrelation function of this stimulus, with spacetime discretized by the bar width and  
791 sampling rate, is

792

$$793 \quad \langle c(t, x)c(t + \tau, x + \rho) \rangle = \frac{1}{2} \delta_{\tau,0} \delta_{\rho,0} + \frac{1}{4} (\delta_{\tau,\delta t} \delta_{\rho,\delta x} + \delta_{\tau,-\delta t} \delta_{\rho,-\delta x})$$

794

795 where  $\delta_{i,j}$  is the Kronecker delta.

796

797 *Three-point glider stimuli (Figure 4)*

798 As in previous studies (Clark et al., 2014; Fitzgerald and Clark, 2015), we constructed three-  
799 point glider stimuli following (Hu and Victor, 2010). Briefly, these binary stimuli enforce



800 correlations over space and time among triplets of pixels. Three-point gliders may be categorized  
801 into four types: converging gliders with positive parity (con+), converging gliders with negative  
802 parity (con-), diverging gliders with positive parity (div+), and diverging gliders with negative  
803 parity (div-). Letting  $\rho$  be the pixel spacing and  $\delta$  be the frame duration (the inverse of the  
804 update rate), the update rules for each of the four three-point glider types are (see kymographs in  
805 **Figure 4**):

806

$$807 \quad c_{\text{con}+}(t, x)c_{\text{con}+}(t, x + \rho)c_{\text{con}+}(t + \delta, x + \rho) = +1$$

$$808 \quad c_{\text{con}-}(t, x)c_{\text{con}-}(t, x + \rho)c_{\text{con}-}(t + \delta, x + \rho) = -1$$

$$809 \quad c_{\text{div}+}(t, x)c_{\text{div}+}(t + \delta, x)c_{\text{div}+}(t + \delta, x + \rho) = +1$$

$$810 \quad c_{\text{div}-}(t, x)c_{\text{div}-}(t + \delta, x)c_{\text{div}-}(t + \delta, x + \rho) = -1$$

811

812 The direction of the displacement of the spatial mean location of each triplet is inverted by  
813 inverting the sign of the pixel spacing. Starting from an initial seed state, the values of each pixel  
814 at each timepoint are determined by these update rules using the surrounding pixels' values. As  
815 we simulate the full 360° of visual space, we use periodic boundary conditions to avoid  
816 undetermined edge pixel values. As in previous studies (Clark et al., 2014; Fitzgerald and Clark,  
817 2015; Leonhardt et al., 2016), the pixel spacing was taken to be 5° in both imaging experiments  
818 and numerical simulations. In imaging experiments, visual stimuli were generated and presented  
819 as described in previous studies (Badwan et al., 2019).

820

821 *Random checkerboard stimuli (Figure 4)*

822 Random checkerboard stimuli were constructed as in (Badwan et al., 2019). Briefly, 5° black or  
823 white bars were placed at random with a density of 40% on a gray background. The resulting  
824 checkerboards were then rigidly translated at a velocity of 100°/s. When combining rightward-  
825 and leftward-moving stimuli, summation was defined such that two white bars summed to white,  
826 two black bars summed to black, and one white and one black bar summed to gray. Therefore,  
827 the contrast of the composite stimulus matched that of the individual components, though its  
828 density rose to 64%.

829

830 *Natural scene stimuli (Figure 5)*

831 Following prior work (Chen et al., 2019; Clark et al., 2014; Fitzgerald and Clark, 2015), we  
832 generated a left-right symmetric ensemble of natural scenes by drawing independent row and  
833 column samples from the database gathered by (Meyer et al., 2014). In this ensemble, scenes  
834 were rigidly-translated at velocities sampled from a Gaussian distribution with a standard  
835 deviation of 100°/s, which roughly matches typical rotational velocities of walking flies  
836 (DeAngelis et al., 2019; Katsov and Clandinin, 2008). To convert the scenes to contrast signals,  
837 we spatially filtered each image with the photoreceptor kernel to generate blurred images  $I_{\text{blur}}$ ,  
838 and then used a Gaussian kernel with a standard deviation of 20° to estimate locally-averaged  
839 images  $I_{\text{mean}}$  (Chen et al., 2019). The contrast signal was then defined as

840

$$841 \quad c(x, y) := \frac{I_{\text{blur}}(x, y) - I_{\text{mean}}(x, y)}{I_{\text{mean}}(x, y)}$$

842

843 As in previous studies of coactivation (Salazar-Gatzimas et al., 2018), the coactivations in Figure  
844 5C were computed as normalized inner products of response timeseries. For all analyses in  
845 Figure 5, we used an ensemble with  $10^6$  elements.

846

## 847 Appendix B: Parameter value selection

848

849 In this appendix, we briefly describe how we selected values of the weighting parameters  
 850  $g_{exc}/g_{leak}$  and  $g_{inh}/g_{leak}$ . We evaluated the model solely based on its ability to produce  
 851 direction-opponent average responses to 1 Hz, 45° sinusoid gratings similar to those measured in  
 852 T4 cells (Badwan et al., 2019). To do so, we considered the direction selectivity index and  
 853 analogous indices of direction-opponency and orthogonal direction enhancement, defined as

854

$$855 \quad DSI := \frac{r(PD) - r(PD)}{r(PD) + r(PD)},$$

856

$$857 \quad I_{PD+ND} := \frac{r(PD + ND) - r(PD)}{r(PD + ND) + r(PD)},$$

858 and

$$859 \quad I_{PD+OD} := \frac{r(PD + OD) - r(PD)}{r(PD + OD) + r(PD)}$$

860

861 As shown in **Figure B1**, there exists a broad region of parameter space for which the model  
 862 produces responses with a similar degree of direction-opponency to that measured in T4 cells  
 863 without significant PD+OD enhancement. We therefore made a simple choice of round-number  
 864 values within that region.

865

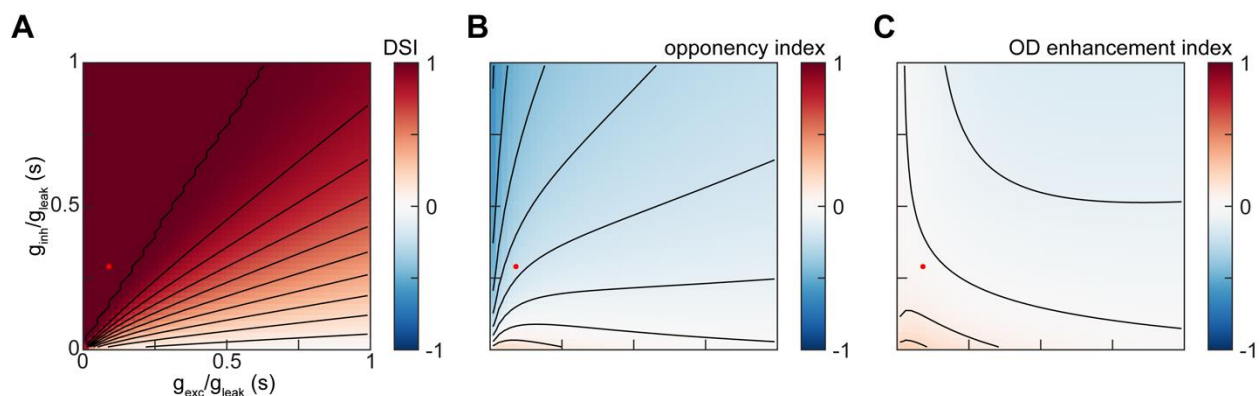

866 Appendix Figure B1, Zavatone-Veth et al. (2019)

867 Appendix Figure B1: Sweeping the parameters of the T4 synaptic model.

- 868 A. The direction-selectivity index of the T4 synaptic model's responses to drifting sinusoid  
869 gratings as a function of  $g_{exc}/g_{leak}$  and  $g_{inh}/g_{leak}$ . Red dot indicates the selected values  
870 of  $g_{exc}/g_{leak} = 0.1$  and  $g_{inh}/g_{leak} = 0.3$ .
- 871 B. As in (A), but for the opponency index.
- 872 C. As in (A), but for the OD enhancement index.
- 873

## 874 **Appendix C: LNLN cascade factorization of the T4 synaptic model**

875

876 In this appendix, we show how our T4 synaptic model may be factorized as a product of linear-  
877 nonlinear-linear-nonlinear (LNLN) cascades representing the numerator and denominator of the  
878 biophysical nonlinearity. The response  $C$  of the full model at each point in spacetime is given in  
879 terms of the filtered contrast signal  $s$  as

880

$$881 \quad C = R^2 \left( \frac{\tilde{g}_1 E_{\text{inh}} + \tilde{g}_2 E_{\text{exc}} + \tilde{g}_3 E_{\text{inh}}}{1 + \tilde{g}_1 + \tilde{g}_2 + \tilde{g}_3} \right)$$

882

883 where we have defined  $\tilde{g}_i := g_i/g_{\text{leak}}$  for brevity. Noting that the denominator of this expression  
884 is always positive, we may re-express the response as

885

$$886 \quad C = \frac{R^2 (\tilde{g}_1 E_{\text{inh}} + \tilde{g}_2 E_{\text{exc}} + \tilde{g}_3 E_{\text{inh}})}{(1 + \tilde{g}_1 + \tilde{g}_2 + \tilde{g}_3)^2}$$

887

888 hence the full EMD model admits a factorization into a product of LNLN models as

889

$$890 \quad C(t, x) = N(t, x) D(t, x)$$

891 where

892

$$893 \quad N(t, x) := R^2 (\tilde{g}_1 E_{\text{inh}} + \tilde{g}_2 E_{\text{exc}} + \tilde{g}_3 E_{\text{inh}})$$

894

895 and

896

$$897 \quad D(t, x) := (1 + \tilde{g}_1 + \tilde{g}_2 + \tilde{g}_3)^{-2}$$

898

899 which is bounded as  $D(t, x) \leq 1$ . Because  $D(t, x) \leq 1$ ,  $C(t, x) \leq N(t, x)$ .

900

901 The denominator LNLN cascade  $D$  is the result of applying a convex function ( $x^{-2}$  for  $x > 0$ ) to  
902 a non-negative linear combination of LN models with convex nonlinearities. Therefore, it cannot

903 generate direction-opponent (DO) average responses to sinusoid gratings. The proof of this  
904 proposition is a minor extension of our previous results on LNLN models with continuously-  
905 differentiable convex nonlinearities and non-negative secondary linear filters (Badwan et al.,  
906 2019). We define the soft ramp function

907

$$908 \quad R_\beta(x) := \beta^{-1} \log(1 + \exp(\beta x))$$

909

910 which is a continuously differentiable, monotone increasing, non-negative, and convex function  
911 of  $x$  for all positive  $\beta$ . As  $\beta \rightarrow \infty$ ,  $R_\beta(x) \rightarrow R(x)$  pointwise. By continuity, defining  $D_\beta(t, x)$   
912 using  $R_\beta$ , we have  $0 \leq D_\beta(t, x) \rightarrow D(t, x) \leq 1$  as  $\beta \rightarrow \infty$ . We denote the nonlinear functional  
913 corresponding to the spacetime average of  $D_\beta(t, x)$  for some input stimulus  $f$  as  $D_\beta[f]$ . As we  
914 have the integrable constant dominating function 1, by the Lebesgue dominated convergence  
915 theorem we have  $0 \leq D_\beta[f] \rightarrow D[f] \leq 1$  as  $\beta \rightarrow \infty$  (Stein and Shakarchi, 2009). By the result of  
916 (Badwan et al., 2019), we know that  $D_\beta[PD + ND] \geq D_\beta[PD]$  and  $D_\beta[PD + ND] \geq D_\beta[ND]$ ,  
917 where  $D_\beta[PD]$ ,  $D_\beta[ND]$ , and  $D_\beta[PD + ND]$  are the average responses to PD, ND, and PD+ND  
918 sinusoid gratings, respectively. As these inequalities hold pointwise for all positive  $\beta$ , by taking  
919  $\beta \rightarrow \infty$  we may obtain  $D[PD + ND] \geq D[PD]$  and  $D[PD + ND] \geq D[ND]$ . Therefore, the  
920 denominator LNLN cascade cannot generate DO average responses to sinusoid gratings.

921

922 However, as the numerator LNLN model is the result of applying a convex function to a non-  
923 convex linear combination of LN models with convex nonlinearities, we cannot analytically  
924 exclude the possibility that it could generate DO average responses to sinusoid gratings using the  
925 results of (Badwan et al., 2019). In fact, numerical simulation shows that it can generate DO  
926 average responses to sinusoid gratings, though it generates strong PD+OD enhancement (**Figure**  
927 **C1**). It also generates DO responses over a smaller region in spatiotemporal frequency space  
928 than the full model. If one replaced the infinitely sharp ramp functions with more biophysically  
929 plausible soft rectifiers, the numerator LNLN cascade would be well-approximated for small  
930 input contrasts by a LN model with a quadratic nonlinearity. Therefore, it could not generate DO  
931 average responses for sufficiently small input contrasts. However, even in the limit in which both  
932 the numerator and denominator are represented as LN models with quadratic nonlinearities, the

933 full model could likely generate DO average responses. In particular, this limiting construction  
934 would resemble a type of adaptive gain model which was previously shown to generate DO  
935 average responses (Badwan et al., 2019).

936

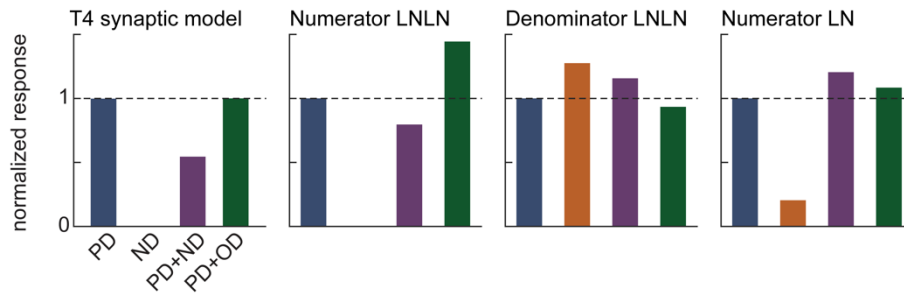

937 **Appendix Figure C1**, Zavatone-Veth et al. (2019)

938 **Appendix Figure C1: Sinusoid grating responses of different components of the LNLN**  
939 **factorization.**

940 *From left to right:* Average responses of the full T4 synaptic model, the numerator LNLN  
941 cascade, the denominator LNLN cascade, and the numerator LN cascade to 1 Hz, 45° sinusoid  
942 gratings. All responses are normalized by the response of the given component to a grating  
943 drifting in the PD of the full model.

944

945 **References**

946

947 Adelson, E., and Bergen, J. (1985). Spatiotemporal energy models for the perception of motion.  
948 *JOSA A* 2, 284-299.

949 Anstis, S. (1970). Phi movement as a subtraction process. *Vision Res* 10, 1411-1430.

950 Arenz, A., Drews, M.S., Richter, F.G., Ammer, G., and Borst, A. (2017). The temporal tuning of  
951 the *Drosophila* motion detectors is determined by the dynamics of their input elements. *Curr Biol*  
952 27, 929-944.

953 Baccus, S., and Meister, M. (2002). Fast and slow contrast adaptation in retinal circuitry. *Neuron*  
954 36, 909-919.

955 Badwan, B.A., Creamer, M.S., Zavatone-Veth, J.A., and Clark, D.A. (2019). Dynamic  
956 nonlinearities enable direction opponency in *Drosophila* elementary motion detectors. *Nat*  
957 *Neurosci* 22, 1318-1326.

958 Barlow, H., and Levick, W.R. (1965). The mechanism of directionally selective units in rabbit's  
959 retina. *J Physiol* 178, 477.

960 Behnia, R., Clark, D.A., Carter, A.G., Clandinin, T.R., and Desplan, C. (2014). Processing  
961 properties of ON and OFF pathways for *Drosophila* motion detection. *Nature* 512, 427-430.

962 Borst, A. (2018). A biophysical mechanism for preferred direction enhancement in fly motion  
963 vision. *PLoS Comp Biol* 14, e1006240.

964 Borst, A., and Egelhaaf, M. (1989). Principles of visual motion detection. *Trends Neurosci* 12,  
965 297-306.

966 Borst, A., Flanagan, V.L., and Sompolinsky, H. (2005). Adaptation without parameter change:  
967 Dynamic gain control in motion detection. *Proc Natl Acad Sci USA* 102, 6172-6176.

968 Borst, A., and Helmstaedter, M. (2015). Common circuit design in fly and mammalian motion  
969 vision. *Nat Neurosci* 18, 1067-1076.

970 Brainard, D.H. (1997). The psychophysics toolbox. *Spatial vision* 10, 433-436.

971 Chen, J., Mandel, H.B., Fitzgerald, J.E., and Clark, D.A. (2019). Asymmetric ON-OFF  
972 processing of visual motion cancels variability induced by the structure of natural scenes. *eLife*  
973 8, e47579.

974 Chen, Q., Pei, Z., Koren, D., and Wei, W. (2016). Stimulus-dependent recruitment of lateral  
975 inhibition underlies retinal direction selectivity. *Elife* 5, e21053.

976 Chichilnisky, E. (2001). A simple white noise analysis of neuronal light responses. *Network:*  
977 *Comput Neural Syst* 12, 199-213.



- 978 Clark, D.A., Benichou, R., Meister, M., and da Silveira, R.A. (2013). Dynamical Adaptation in  
979 Photoreceptors. *PLoS Comp Biol* 9, e1003289.
- 980 Clark, D.A., Bursztyn, L., Horowitz, M.A., Schnitzer, M.J., and Clandinin, T.R. (2011). Defining  
981 the computational structure of the motion detector in *Drosophila*. *Neuron* 70, 1165-1177.
- 982 Clark, D.A., and Demb, J.B. (2016). Parallel computations in insect and mammalian visual  
983 motion processing. *Curr Biol* 26, R1062-R1072.
- 984 Clark, D.A., Fitzgerald, J.E., Ales, J.M., Gohl, D.M., Silies, M., Norcia, A.M., and Clandinin,  
985 T.R. (2014). Flies and humans share a motion estimation strategy that exploits natural scene  
986 statistics. *Nat Neurosci* 17, 296-303.
- 987 Creamer, M.S., Mano, O., and Clark, D.A. (2018). Visual Control of Walking Speed in  
988 *Drosophila*. *Neuron* 100, 1460-1473.
- 989 Creamer, M.S., Mano, O., Tanaka, R., and Clark, D.A. (2019). A flexible geometry for  
990 panoramic visual and optogenetic stimulation during behavior and physiology. *J Neurosci*  
991 *Methods* 323, 48-55.
- 992 Dayan, P., and Abbott, L.F. (2001). *Theoretical neuroscience* (Cambridge, MA: MIT Press).
- 993 DeAngelis, B.D., Zavatone-Veth, J.A., and Clark, D.A. (2019). The manifold structure of limb  
994 coordination in walking *Drosophila*. *eLife* 8, e46409.
- 995 Deb, K. (2014). Multi-objective optimization. In *Search methodologies* (Springer), pp. 403-449.
- 996 Dror, R.O., O'Carroll, D.C., and Laughlin, S.B. (2001). Accuracy of velocity estimation by  
997 Reichardt correlators. *JOSA A* 18, 241-252.
- 998 Efron, B. (1987). Better bootstrap confidence intervals. *Journal of the American statistical*  
999 *Association* 82, 171-185.
- 1000 Eichner, H., Joesch, M., Schnell, B., Reiff, D.F., and Borst, A. (2011). Internal structure of the  
1001 fly elementary motion detector. *Neuron* 70, 1155-1164.
- 1002 Euler, T., Detwiler, P.B., and Denk, W. (2002). Directionally selective calcium signals in  
1003 dendrites of starburst amacrine cells. *Nature* 418, 845-852.
- 1004 Famiglietti Jr, E.V. (1983). On and off pathways through amacrine cells in mammalian retina:  
1005 the synaptic connections of "starburst" amacrine cells. *Vision Res* 23, 1265-1279.
- 1006 Fisher, Y.E., Silies, M., and Clandinin, T.R. (2015). Orientation selectivity sharpens motion  
1007 detection in *Drosophila*. *Neuron* 88, 390-402.
- 1008 Fitzgerald, J.E., and Clark, D.A. (2015). Nonlinear circuits for naturalistic visual motion  
1009 estimation. *eLife*, e09123.

- 1010 Fitzgerald, J.E., Katsov, A.Y., Clandinin, T.R., and Schnitzer, M.J. (2011). Symmetries in  
1011 stimulus statistics shape the form of visual motion estimators. *Proc Natl Acad Sci USA* *108*,  
1012 12909-12914.
- 1013 Fransen, J.W., and Borghuis, B.G. (2017). Temporally Diverse Excitation Generates Direction-  
1014 Selective Responses in ON-and OFF-Type Retinal Starburst Amacrine Cells. *Cell Rep* *18*, 1356-  
1015 1365.
- 1016 Freifeld, L., Clark, D.A., Schnitzer, M.J., Horowitz, M.A., and Clandinin, T.R. (2013).  
1017 GABAergic lateral interactions tune the early stages of visual processing in *Drosophila*. *Neuron*  
1018 *78*, 1075-1089.
- 1019 Geisler, W.S. (2008). Visual perception and the statistical properties of natural scenes. *Annu Rev*  
1020 *Psychol* *59*, 167-192.
- 1021 Gruntman, E., Romani, S., and Reiser, M.B. (2018). Simple integration of fast excitation and  
1022 offset, delayed inhibition computes directional selectivity in *Drosophila*. *Nat Neurosci*, 1.
- 1023 Haag, J., Arenz, A., Serbe, E., Gabbiani, F., and Borst, A. (2016). Complementary mechanisms  
1024 create direction selectivity in the fly. *Elife* *5*.
- 1025 Hassenstein, B., and Reichardt, W. (1956). Systemtheoretische Analyse der Zeit-, Reihenfolgen-  
1026 und Vorzeichenbewertung bei der Bewegungsperson des Rüsselkäfers *Chlorophanus*. *Zeits*  
1027 *Naturforsch* *11*, 513–524.
- 1028 Hollander, M., Wolfe, D.A., and Chicken, E. (2013). Nonparametric statistical methods, Vol 751  
1029 (John Wiley & Sons).
- 1030 Howard, J., Dubs, A., and Payne, R. (1984). The dynamics of phototransduction in insects. *J*  
1031 *Comp Physiol A* *154*, 707-718.
- 1032 Hu, Q., and Victor, J.D. (2010). A set of high-order spatiotemporal stimuli that elicit motion and  
1033 reverse-phi percepts. *J Vis* *10*.
- 1034 Jagadeesh, B., Wheat, H.S., and Ferster, D. (1993). Linearity of summation of synaptic potentials  
1035 underlying direction selectivity in simple cells of the cat visual cortex. *Science* *262*, 1901-1904.
- 1036 Joesch, M., Schnell, B., Raghu, S., Reiff, D., and Borst, A. (2010). ON and OFF pathways in  
1037 *Drosophila* motion vision. *Nature* *468*, 300-304.
- 1038 Kato, S., Xu, Y., Cho, C.E., Abbott, L., and Bargmann, C.I. (2014). Temporal responses of *C.*  
1039 *elegans* chemosensory neurons are preserved in behavioral dynamics. *Neuron* *81*, 616-628.
- 1040 Katsov, A., and Clandinin, T. (2008). Motion processing streams in *Drosophila* are behaviorally  
1041 specialized. *Neuron* *59*, 322-335.

- 1042 Kim, J.S., Greene, M.J., Zlateski, A., Lee, K., Richardson, M., Turaga, S.C., Purcaro, M.,  
1043 Balkam, M., Robinson, A., and Behabadi, B.F. (2014). Space-time wiring specificity supports  
1044 direction selectivity in the retina. *Nature* 509, 331-336.
- 1045 Kim, K., and Rieke, F. (2001). Temporal contrast adaptation in the input and output signals of  
1046 salamander retinal ganglion cells. *J Neurosci* 21, 287-299.
- 1047 Kleiner, M., Brainard, D., Pelli, D., Ingling, A., Murray, R., and Broussard, C. (2007). What's  
1048 new in Psychtoolbox-3. *Perception* 36, 1.
- 1049 Kunze, P. (1961). Untersuchung des Bewegungssehens fixiert fliegender Bienen. *Zeitschrift für*  
1050 *vergleichende Physiologie* 44, 656-684.
- 1051 Leong, J.C.S., Esch, J.J., Poole, B., Ganguli, S., and Clandinin, T.R. (2016). Direction selectivity  
1052 in *Drosophila* emerges from preferred-direction enhancement and null-direction suppression. *J*  
1053 *Neurosci* 36, 8078-8092.
- 1054 Leonhardt, A., Ammer, G., Meier, M., Serbe, E., Bahl, A., and Borst, A. (2016). Asymmetry of  
1055 *Drosophila* ON and OFF motion detectors enhances real-world velocity estimation. *Nat Neurosci*  
1056 19, 706–715.
- 1057 Maisak, M.S., Haag, J., Ammer, G., Serbe, E., Meier, M., Leonhardt, A., Schilling, T., Bahl, A.,  
1058 Rubin, G.M., Nern, A., *et al.* (2013). A directional tuning map of *Drosophila* elementary motion  
1059 detectors. *Nature* 500, 212-216.
- 1060 Mano, O., Matulis, C.A., Creamer, M.S., Salazar-Gatzimas, E., Chen, J., Zavatone-Veth, J.A.,  
1061 and Clark, D.A. (2019). Using slow frame rate imaging to extract fast receptive fields. *Nature*  
1062 *Communications* 10, 4979.
- 1063 Marr, D., and Poggio, T. (1976). From understanding computation to understanding neural  
1064 circuitry. In *AI Memo* (Massachusetts Institute of Technology).
- 1065 Meier, M., Serbe, E., Maisak, M.S., Haag, J., Dickson, B.J., and Borst, A. (2014). Neural circuit  
1066 components of the *Drosophila* OFF motion vision pathway. *Curr Biol* 24, 385-392.
- 1067 Meyer, H.G., Schwegmann, A., Lindemann, J.P., and Egelhaaf, M. (2014). Panoramic high  
1068 dynamic range images in diverse environments.
- 1069 Mo, C.-H., and Koch, C. (2003). Modeling reverse-phi motion-selective neurons in cortex:  
1070 double synaptic-veto mechanism. *Neural Comput* 15, 735-759.
- 1071 Pelli, D.G. (1997). The VideoToolbox software for visual psychophysics: Transforming numbers  
1072 into movies. *Spatial vision* 10, 437-442.
- 1073 Potters, M., and Bialek, W. (1994). Statistical mechanics and visual signal processing. *J*  
1074 *Physique* 4, 1755-1775.

- 1075 Priebe, N.J., Lisberger, S.G., and Movshon, J.A. (2006). Tuning for spatiotemporal frequency  
1076 and speed in directionally selective neurons of macaque striate cortex. *J Neurosci* 26, 2941-2950.
- 1077 Qian, N., Andersen, R.A., and Adelson, E.H. (1994). Transparent motion perception as detection  
1078 of unbalanced motion signals. I. Psychophysics. *J Neurosci* 14, 7357-7366.
- 1079 Rieke, F. (2001). Temporal contrast adaptation in salamander bipolar cells. *J Neurosci* 21, 9445-  
1080 9454.
- 1081 Salazar-Gatzimas, E., Agrochao, M., Fitzgerald, J.E., and Clark, D.A. (2018). The Neuronal  
1082 Basis of an Illusory Motion Percept Is Explained by Decorrelation of Parallel Motion Pathways.  
1083 *Curr Biol* 28, 3748-3762. e3748.
- 1084 Salazar-Gatzimas, E., Chen, J., Creamer, M.S., Mano, O., Mandel, H.B., Matulis, C.A.,  
1085 Pottackal, J., and Clark, D.A. (2016). Direct measurement of correlation responses in *Drosophila*  
1086 elementary motion detectors reveals fast timescale tuning. *Neuron* 92, 227-239.
- 1087 Sanes, J.R., and Zipursky, S.L. (2010). Design principles of insect and vertebrate visual systems.  
1088 *Neuron* 66, 15.
- 1089 Serbe, E., Meier, M., Leonhardt, A., and Borst, A. (2016). Comprehensive characterization of the  
1090 major presynaptic elements to the *Drosophila* OFF motion detector. *Neuron* 89, 829-841.
- 1091 Shinomiya, K., Huang, G., Lu, Z., Parag, T., Xu, C.S., Aniceto, R., Ansari, N., Cheatham, N.,  
1092 Lauchie, S., and Neace, E. (2019). Comparisons between the ON-and OFF-edge motion  
1093 pathways in the *Drosophila* brain. *eLife* 8, e40025.
- 1094 Stavenga, D. (2003). Angular and spectral sensitivity of fly photoreceptors. II. Dependence on  
1095 facet lens F-number and rhabdomere type in *Drosophila*. *Journal of Comparative Physiology A:*  
1096 *Neuroethology, Sensory, Neural, and Behavioral Physiology* 189, 189-202.
- 1097 Stein, E.M., and Shakarchi, R. (2009). *Real analysis: measure theory, integration, and Hilbert*  
1098 *spaces* (Princeton University Press).
- 1099 Straw, A.D., Rainsford, T., and O'Carroll, D.C. (2008). Contrast sensitivity of insect motion  
1100 detectors to natural images. *J Vis* 8, 32-32.
- 1101 Strother, J.A., Wu, S.-T., Wong, A.M., Nern, A., Rogers, E.M., Le, J.Q., Rubin, G.M., and  
1102 Reiser, M.B. (2017). The emergence of directional selectivity in the visual motion pathway of  
1103 *Drosophila*. *Neuron* 94, 168-182. e110.
- 1104 Takemura, S.-y., Bharioke, A., Lu, Z., Nern, A., Vitaladevuni, S., Rivlin, P.K., Katz, W.T.,  
1105 Olbris, D.J., Plaza, S.M., and Winston, P. (2013). A visual motion detection circuit suggested by  
1106 *Drosophila* connectomics. *Nature* 500, 175-181.
- 1107 Takemura, S.-y., Nern, A., Chklovskii, D.B., Scheffer, L.K., Rubin, G.M., and Meinertzhagen,  
1108 I.A. (2017). The comprehensive connectome of a neural substrate for 'ON' motion detection in  
1109 *Drosophila*. *Elife* 6.

- 1110 Torre, V., and Poggio, T. (1978). A synaptic mechanism possibly underlying directional  
1111 selectivity to motion. *Proc R Soc Lond B* *202*, 409-416.
- 1112 Wienecke, C.F., Leong, J.C., and Clandinin, T.R. (2018). Linear Summation Underlies Direction  
1113 Selectivity in *Drosophila*. *Neuron*.
- 1114 Yang, H.H., and Clandinin, T.R. (2018). Elementary motion detection in *Drosophila*: algorithms  
1115 and mechanisms. *Ann Rev Vis Sci* *4*, 143-163.
- 1116 Yang, H.H., St-Pierre, F., Sun, X., Ding, X., Lin, M.Z., and Clandinin, T.R. (2016). Subcellular  
1117 imaging of voltage and calcium signals reveals neural processing in vivo. *Cell* *166*, 245–257.
- 1118 Zheng, L., de Polavieja, G.G., Wolfram, V., Asyali, M.H., Hardie, R.C., and Juusola, M. (2006).  
1119 Feedback network controls photoreceptor output at the layer of first visual synapses in  
1120 *Drosophila*. *J Gen Physiol* *127*, 495-510.  
1121
